1 *Article – The EMBO JOURNAL*

2 **Oligomeric  $\alpha$ -synuclein-specific degradation by HtrA2/Omi**  
3 **to bestow a neuroprotective function**

4 Hea-Jong Chung<sup>1</sup>, Mohammad Abu Hena Mostofa Jamal<sup>1,3</sup>, Md. Mashiar Rahman<sup>1</sup>, Hyeon-Jin  
5 Kim<sup>2</sup> and Seong-Tshool Hong<sup>1</sup>

6 <sup>1</sup>Department of Biomedical Sciences and Institute for Medical Science, Chonbuk National  
7 University Medical School, Jeonju, Chonbuk 54907, South Korea

8 <sup>2</sup>JINIS BDRD institute, JINIS Biopharmaceuticals Co., 913 Gwahak-Ro, Bongdong, Wanju,  
9 Chonbuk 55321, South Korea

10 <sup>3</sup>Department of Biotechnology and Genetic Engineering, Islamic University, Kushtia-7003,  
11 Bangladesh

12 These authors contributed equally: Hea-Jong Chung, Mohammad Abu Hena Mostofa Jamal

13 Correspondence: Seong-Tshool Hong (seonghong@chonbuk.ac.kr)

14 Running title: HtrA2/Omi to bestow a neuroprotective function

15 Although the malfunction of HtrA2/Omi leads to Parkinson's disease (PD), the underlying  
16 mechanism has remained unknown. Here, we showed that HtrA2/Omi specifically removed  
17 oligomeric  $\alpha$ -Syn but not monomeric  $\alpha$ -Syn to protect oligomeric  $\alpha$ -Syn-induced  
18 neurodegeneration. Experiments using *mnd2* mice indicated that HtrA2/Omi degraded oligomeric  
19  $\alpha$ -Syn specifically without affecting monomers. Transgenic *Drosophila melanogaster*  
20 experiments of the co-expression  $\alpha$ -Syn and HtrA2/Omi and expression of genes individually also  
21 confirmed that pan-neuronal expression of HtrA2/Omi completely rescued Parkinsonism in the  $\alpha$ -  
22 Syn-induced PD *Drosophila* model by specifically removing oligomeric  $\alpha$ -Syn. HtrA2/Omi  
23 maintained the health and integrity of the brain and extended the life span of transgenic flies.  
24 Because HtrA2/Omi specifically degraded oligomeric  $\alpha$ -Syn, co-expression of HtrA2/Omi and  $\alpha$ -  
25 Syn in *Drosophila* eye maintained a healthy retina, while the expression of  $\alpha$ -Syn induced retinal  
26 degeneration. This work showed that the bacterial function of HtrA to degrade toxic misfolded  
27 proteins is evolutionarily conserved in mammalian brains as HtrA2/Omi.

## 28 INTRODUCTION

29 Parkinson's disease (PD) is one of the most common neurodegenerative diseases, characterized by  
30 the progressive loss of dopaminergic neurons in the substantia nigra of the central nervous system<sup>1</sup>.  
31 The degeneration of the dopaminergic neurons of the substantia nigra results in clinical  
32 manifestations such as motor impairments, which involve resting tremor, bradykinesia, postural  
33 instability, gait difficulty and rigidity<sup>2</sup>. Although the degeneration of dopaminergic neurons  
34 directly leads to the clinical manifestations of PD, the pathogenic mechanism underlying the  
35 degeneration of dopaminergic neurons at the molecular level is still unclear. The most manifested  
36 pathophysiological feature of dopaminergic neurons of PD is an abnormal accumulation of  
37 oligomeric  $\alpha$ -Synuclein ( $\alpha$ -Syn) in the form of Lewy bodies and Lewy neuritis inside neurons,  
38 which represent the major hallmarks of PD<sup>3</sup>.  $\alpha$ -Syn is a 140-a.a. presynaptic protein that plays an  
39 important role in maintaining a supply of synaptic vesicles in presynaptic terminals<sup>4, 5</sup>.  $\alpha$ -Syn  
40 performs its normal biological function in neurons if present as a monomer. However, the  
41 monomeric form of  $\alpha$ -Syn is naturally prone to adopt a  $\beta$ -sheet conformation to form oligomeric  
42 aggregates<sup>6</sup>. The oligomeric  $\alpha$ -Syn has very strong neurotoxicity such that the aggregation plays a  
43 causative role in dopaminergic neuronal degeneration<sup>7, 8</sup>.

44 Since the accumulation of misfolded  $\alpha$ -Syn is key to the pathology of PD, the question of how  
45 misfolded  $\alpha$ -Syn is degraded by neurons has been actively investigated. Investigations over the  
46 last decades have elucidated that the ubiquitin-proteasome system (UPS) and the autophagy-  
47 lysosomal pathway (ALP) work in conjunction to degrade  $\alpha$ -Syn<sup>9, 10</sup>. However, neither UPS nor  
48 ALP are specific pathways for  $\alpha$ -Syn degradation but rather are for general intracellular protein  
49 turn-over pathways<sup>11-13</sup>. More importantly, none of the pathways have shown selectivity toward  
50 oligomeric  $\alpha$ -Syn, and thus almost all the wasted proteins in cells, including monomeric  $\alpha$ -Syn,

51 are degraded by the pathways. Therefore, the mechanisms for oligomeric  $\alpha$ -Syn degradation  
52 pathway to relieve the toxicity of oligomeric  $\alpha$ -Syn in neurons remain completely unknown.

53 One of the dilemmas in neurons concerns the lack of toxicity of native monomeric  $\alpha$ -Syn;  
54 rather, it is essential for proper neuronal functions, while oligomeric  $\alpha$ -Syn is very neurotoxic<sup>14</sup>.  
55 Because monomeric  $\alpha$ -Syn plays indispensable roles in neurons, the  $\alpha$ -Syn knock-out mouse  
56 shows impaired spatial learning and working memory<sup>15</sup>. Considering that monomeric  $\alpha$ -Syn has a  
57 naturally strong tendency to self-aggregate into neurotoxic oligomers<sup>16, 17</sup>, it is reasonable to  
58 speculate that neurons have an unknown pathway that specifically recognizes oligomeric  $\alpha$ -Syn  
59 only to degrade oligomeric  $\alpha$ -Syn without affecting the monomeric form.

60 HtrA2/Omi is a homolog of the bacterial heat shock protein HtrA (also known as DegP), which  
61 protects bacteria at elevated temperatures by specifically recognizing denatured proteins to  
62 degrade those proteins<sup>18-20</sup>. HtrA2/Omi is evolutionarily well-conserved with respect to amino acid  
63 sequence and its three-dimensional structure<sup>20</sup>, suggesting that the mammalian version of  
64 HtrA/DegP could also play proteolytic roles to specifically recognize and degrade denatured  
65 proteins in mammals. In fact, the HtrA2/Omi knockout mouse and loss-of function HtrA2/Omi  
66 mutant have both demonstrated that HtrA2/Omi functions as a neuroprotective protein to prevent  
67 PD<sup>6, 21, 22</sup>. Accordingly, mutations in HtrA2/Omi have been repeatedly found in patients suffering  
68 from PD<sup>23-26</sup>. However, the molecular mechanism underlying the neuroprotective role of  
69 HtrA2/Omi in PD has remained unknown until now, although it is certain that HtrA2/Omi plays  
70 an essential role in preventing PD.

71 Because the main function of HtrA/DegP in bacteria is to recognize misfolded or aggregated  
72 proteins to specifically degrade those proteins, we speculated that HtrA2/Omi could play an  
73 important role in removing misfolded or aggregated proteins in mammals as it does in bacteria.

74 Because all the *in vivo* and clinical data consistently indicate that HtrA2/Omi is linked to PD  
75 progression and oligomeric  $\alpha$ -Syn is the main misfolded protein aggregate in neurons, we  
76 investigated the potential molecular mechanism of HtrA2/Omi in terms of whether it specifically  
77 inhibits the formation of misfolded  $\alpha$ -Syn or degrades oligomeric  $\alpha$ -Syn to prevent PD. All of our  
78 *in vitro* and *in vivo* experiments using transgenic *Drosophila* and mice showed that HtrA2/Omi  
79 specifically recognizes and degrades oligomeric  $\alpha$ -Syn but not monomeric  $\alpha$ -Syn, indicating that  
80 HtrA2/Omi prevents oligomeric  $\alpha$ -Syn-induced neurotoxicity to protect neurons from  
81 neurodegeneration by removing specifically misfolded or aggregated proteins, i.e., oligomeric  $\alpha$ -  
82 Syn, just like it does in bacteria.

## 83 RESULTS

84 HtrA2/Omi specifically recognized and degraded oligomeric  $\alpha$ -Syn  
85 To confirm our speculation concerning whether the function of HtrA2/Omi in mammals is  
86 evolutionary conserved to protect neurons from oligomeric  $\alpha$ -Syn-induced toxicity, we examined  
87 how human recombinant HtrA2/Omi (hOmi) produced in *E. coli* BL21 (DE3) pLysS-pET28a+  
88 reacted with oligomerized  $\alpha$ -Syn. As shown in Fig. 1a, hOmi specifically removed oligomeric  $\alpha$ -  
89 Syn at 37 ~ 41°C without affecting monomeric  $\alpha$ -Syn. These data raised both possibilities that  
90 HtrA2/Omi removed oligomeric  $\alpha$ -Syn by degradation or a chaperone action on oligomeric  $\alpha$ -Syn  
91 to re-establish its monomeric form. To investigate these two possibilities of hOmi on oligomeric  
92  $\alpha$ -Syn, we specifically isolated oligomeric  $\alpha$ -Syn from oligomerized  $\alpha$ -Syn (Supplementary  
93 Information, Figure S1a) using a size exclusion column (Supplementary Information, Figure S1b).  
94 hOmi treatment of the purified oligomeric  $\alpha$ -Syn resulted in complete degradation, while hOmi  
95 treatment had no effect on monomeric  $\alpha$ -Syn (Fig. 1b). We further confirmed the oligomer-specific  
96 degradation of  $\alpha$ -Syn by hOmi using the oligomer-specific fluorescent dye thioflavin-T (ThT).

97 Supplementary Information Figure S2 shows that hOmi not only degraded oligomeric  $\alpha$ -Syn  
98 specifically but also in a manner that was dose-dependent on its substrate, oligomeric  $\alpha$ -Syn,  
99 indicating that hOmi precisely recognizes only oligomeric  $\alpha$ -Syn. These results clearly indicated  
100 that hOmi specifically recognized and degraded oligomeric  $\alpha$ -Syn without affecting monomeric  
101  $\alpha$ -Syn, a native form of  $\alpha$ -Syn. In addition, because of the specific removal of oligomeric  $\alpha$ -Syn  
102 by hOmi, co-treatment of oligomerized  $\alpha$ -Syn consisting of a mixture of oligomeric and  
103 monomeric  $\alpha$ -Syn resulted in a significant increase in cell viability in response to hOmi in a dose-  
104 dependent manner (Supplementary Information, Figure S3).

105 HtrA2/Omi is an evolutionarily well-conserved serine protease, and its protease activity is  
106 inhibited by UCF-101<sup>20</sup>. As expected, UCF-101 completely inhibited the oligomeric  $\alpha$ -Syn-  
107 specific protease activity of hOmi (Fig. 1a, b). These results indicated that the nucleophilic attack  
108 reaction by serine in the active site of hOmi was responsible for the oligomer-specific degradation  
109 of  $\alpha$ -Syn. After identifying the enzymatic characteristics, we further analyzed the enzymatic  
110 kinetics of oligomeric  $\alpha$ -Syn hydrolysis by hOmi after labeling  $\alpha$ -Syn with ThT. The Lineweaver-  
111 Burk plot on the reactions yielded a  $K_m$  value of 2.569  $\mu$ M and  $V_{max}$  value of 2.223 nmol/min/mg  
112 protein for oligomeric  $\alpha$ -Syn degradation (Fig. 1c).

113 Loss of HtrA2/Omi led to an accumulation of oligomeric  $\alpha$ -Syn in mouse brain

114 The *in vitro* experiments examining the effects of HtrA2/Omi on oligomeric  $\alpha$ -Syn raised  
115 questions regarding the *in vivo* role of HtrA2/Omi. Before investigating the *in vivo* functions of  
116 HtrA2/Omi, we tested whether hOmi could function as a general protease like other serine  
117 proteases, such as trypsin, or as a specific protease for particular substrates. Coincubation of hOmi  
118 with brain extracts from mnd2, HtrA2/Omi-null mutant, and wild type mice did not reveal any  
119 noticeable proteolytic degradation (Fig. 2a), which indicated that hOmi functioned as a very

120 specific protease. Western blotting of the gel with a  $\alpha$ -Syn-specific monoclonal antibody showed  
121 that the *mnd2/mnd2* mouse accumulated a large quantity of oligomeric  $\alpha$ -Syn, unlike the wild type  
122 littermate control (Fig. 2b). The accumulation of a large quantity of oligomeric  $\alpha$ -Syn in *mnd2*  
123 mice cast light on the pathogenic mechanism by which the mutation of HtrA2/Omi causes PD.  
124 Since oligomeric  $\alpha$ -Syn directly causes PD<sup>14, 17, 27</sup>, it is reasonable that the accumulation of a large  
125 quantity of oligomeric  $\alpha$ -Syn in *mnd2* mice induces PD. hOmi treatment of the total protein extract  
126 from *mnd2* mice resulted in complete degradation of the accumulated  $\alpha$ -Syn oligomers without  
127 affecting the monomers (Fig. 2b). This result suggests that the loss of HtrA2/Omi, as in  
128 *mnd2/mnd2* mice, causes PD by the loss of its ability to degrade oligomeric  $\alpha$ -Syn.

129 If the proteolytic activity of HtrA2/Omi is required to prevent oligomeric  $\alpha$ -Syn-induced  
130 neurotoxicity, the intracellular localization of HtrA2/Omi and  $\alpha$ -Syn should be equivalent. The  
131 immunohistochemical confocal microscopy experiments examining the substantia nigra and  
132 striatum of 4-week-old *mnd2/mnd2* mice and their age-matched wild-type littermates confirmed  
133 the co-localization of HtrA2/Omi and  $\alpha$ -Syn in mouse brain tissue (Fig. 2c), indicating that the  
134 intracellular localization of HtrA2/Omi and  $\alpha$ -Syn is equivalent. The immunocytochemical study  
135 showed that  $\alpha$ -Syn and HtrA2/Omi were located in mitochondria (Fig. 2d) and ER (Fig. 2e).  
136 Overall, the *mnd2* mouse experiments suggested that the failure of HtrA2/Omi to remove  
137 neurotoxic oligomeric  $\alpha$ -Syn in the ER and mitochondria led to ER stress and mitochondrial  
138 dysfunction in neurons through the accumulation of a large quantity of oligomeric  $\alpha$ -Syn, the  
139 hallmark of PD pathogenesis. Although ER stress and mitochondrial dysfunction in neurons are  
140 the most evident pathological phenomena observed in PD<sup>28, 29</sup>, the mechanisms underlying ER  
141 stress and mitochondrial dysfunction in PD neurons have not been elucidated. This work clearly  
142 showed the pathological mechanism of ER stress and mitochondrial dysfunction in PD.

143 Pan-neuronal expression of hOmi rescued Parkinsonism in a *Drosophila* model of Parkinson's  
144 disease

145 After observing the specific degradation of oligomeric  $\alpha$ -Syn by hOmi in *mnd2* mice, we created  
146 a transgenic hOmi *Drosophila* with *w<sup>1118</sup> Drosophila melanogaster* by inserting the full-length  
147 human Omi gene under the control of the UAS promoter (*UAS-hOmi*), where the heat shock 70  
148 promoter was used as a control source of transposase (Supplementary Information, Figure S4).  
149 The transgenic hOmi *Drosophila* line was heterozygous for the dominantly marked CyO balancer  
150 chromosome carrying a dominant mutation, CyO, which causes curly wings for easy detection.  
151 From the results of the genotyping and protein expression levels of transgenic hOmi *Drosophila*  
152 flies, Tg4 (*X/Y; hOmi/Cyo; +/+*), in which *UAS-hOmi* was integrated into chromosome 2, was  
153 identified as the best hOmi transgenic line for subsequent experiments.

154 The hOmi *Drosophila* Tg4 was bred with a *Drosophila* model of Parkinson's disease ( $\alpha$ -Syn  
155 *Drosophila*) carrying the homozygous human  $\alpha$ -Syn gene (*UAS- $\alpha$ -Syn*) on chromosome 3  
156 (Supplementary Information, Figure S5). Female  $\alpha$ -Syn *Drosophila* were mated with male hOmi  
157 *Drosophila*, and *+/hOmi;  $\alpha$ -Syn/+* flies were selected based on the dominant phenotypes of the  
158 balancer chromosome CyO. The first filial *+/hOmi;  $\alpha$ -Syn/+* flies were crossed to generate various  
159 genotypes. The final homozygous *x/y; hOmi/hOmi;  $\alpha$ -Syn/ $\alpha$ -Syn* flies were selected after  
160 genotyping the progenies from the F2 generation. The male *hOmi/hOmi;  $\alpha$ -Syn/ $\alpha$ -Syn* flies, 45M,  
161 were crossed with virgin female *elav-GAL4* flies for pan-neuronal co-expression of hOmi and  $\alpha$ -  
162 Syn (*hOmi/ $\alpha$ -Syn Drosophila, x/y; +/hOmi; +/ $\alpha$ -Syn*).

163 Since the Parkinsonism phenotype of  $\alpha$ -Syn *Drosophila* is characterized by locomotor defects  
164 accompanied by reduced survivability<sup>30, 31</sup>, locomotor defects and survivability were tested in the  
165 hOmi,  $\alpha$ -Syn and hOmi/ $\alpha$ -Syn *Drosophila* lines to assess the effect of hOmi on  $\alpha$ -Syn-induced



166 Parkinsonism (Fig. 3). As shown in Fig. 3a, loss of climbing ability of  $\alpha$ -Syn *Drosophila* was  
167 completely rescued by co-expression with hOmi. The performance index of locomotion was  
168 significantly lower in  $\alpha$ -Syn *Drosophila* than hOmi/ $\alpha$ -Syn *Drosophila* or hOmi *Drosophila* of the  
169 same age. As previously reported, the survival rate of  $\alpha$ -Syn *Drosophila* was significantly reduced  
170 as a phenotype of *Drosophila* Parkinsonism. However, the survival rate of hOmi/ $\alpha$ -Syn  
171 *Drosophila* was increased as much as wild type, indicating that hOmi/HtrA2 completely rescued  
172 the *Drosophila* Parkinsonism induced by  $\alpha$ -Syn (Fig. 3b). Kaplan–Meier Survival analyses also  
173 showed that hOmi/HtrA2 completely rescued the *Drosophila* Parkinsonism (Supplementary  
174 Information, Figure S6). Overall, pan-neuronal co-expression of hOmi with  $\alpha$ -Syn completely  
175 rescued the Parkinsonism phenotypes of  $\alpha$ -Syn *Drosophila*. Additionally, it is interesting to note  
176 that pan-neuronal sole expression of hOmi (hOmi *Drosophila*) resulted in better performance in  
177 the locomotor reaction and increased survival rate compared with the wild type control.

178 Human HtrA2/Omi rescued the  $\alpha$ -Syn-Induced neurotoxicity in a *Drosophila* model of  
179 Parkinson's disease by oligomeric  $\alpha$ -Syn-specific degradation

180 To investigate how hOmi rescues  $\alpha$ -Syn-induced neurotoxicity in *Drosophila*, histological  
181 examinations were performed using the hOmi/ $\alpha$ -Syn *Drosophila* line along with wild-type, hOmi  
182 and  $\alpha$ -Syn *Drosophila* lines. Immunohistochemical confocal microscopy using an oligomer-  
183 specific monoclonal antibody, anti- $\alpha$ -Syn (ASy05), on brain sections showed that co-expression  
184 of hOmi and  $\alpha$ -Syn completely eliminated the oligomeric  $\alpha$ -Syn (Fig. 4a), which is consistent  
185 with the *in vitro* and mouse experiments (Fig. 1 and 2). Quantification of the green fluorescent  
186 intensity in the flies definitively revealed a large quantity of oligomeric  $\alpha$ -Syn accumulation only  
187 in  $\alpha$ -Syn *Drosophila* (Fig. 4b). However, there were no detectable  $\alpha$ -Syn oligomers in hOmi/ $\alpha$ -  
188 Syn *Drosophila*. We further confirmed the specific degradation of  $\alpha$ -Syn oligomers by hOmi with

189 total protein extracts of hOmi/ $\alpha$ -Syn fly brains (Fig. 4c). Anti- $\alpha$ -Syn antibody detected both  
190 oligomeric and monomeric  $\alpha$ -Syn in  $\alpha$ -Syn *Drosophila*. However, only monomeric  $\alpha$ -Syn was  
191 detected by western blotting of hOmi/ $\alpha$ -Syn *Drosophila*. This *in vivo* result clearly confirmed that  
192 HtrA2/Omi specifically recognized and degraded oligomeric  $\alpha$ -Syn without affecting monomeric  
193  $\alpha$ -Syn. Considering that oligomeric  $\alpha$ -Syn has strong neurotoxicity to function as an etiological  
194 agent for PD while monomeric  $\alpha$ -Syn lacks neurotoxicity, rather playing an essential role in  
195 maintaining a supply of synaptic vesicles in presynaptic terminals<sup>32, 33</sup>, this result shed light on  
196 how hOmi provides a neuroprotective function in PD.

197 We further investigated *Drosophila* brains after immunostaining with anti- $\alpha$ -Syn and anti-  
198 HtrA2 antibodies. An age-dependent accumulation of  $\alpha$ -Syn clearly caused the accumulation of  
199 Lewy bodies in  $\alpha$ -Syn *Drosophila*, whereas co-expression of hOmi with  $\alpha$ -Syn in hOmi/ $\alpha$ -Syn  
200 *Drosophila* completely prevented the accumulation of Lewy bodies, and the overall integrity of  
201 the brain tissue was the same as the normal control (Fig. 5a, b). H&E staining of the brain slices  
202 of the flies further confirmed a clear neurodegeneration in the  $\alpha$ -Syn *Drosophila* (Fig. 6a, b). The  
203 integrity of the brain tissue was observed in both young and aged hOmi/ $\alpha$ -Syn *Drosophila* as in  
204 the case of control flies and hOmi *Drosophila*, but not in aged  $\alpha$ -Syn *Drosophila* due to  
205 neurodegeneration. The brains of 40-day-old  $\alpha$ -Syn *Drosophila* showed clear neuronal loss with  
206 astrocytosis and the appearance of Lewy bodies both in male (Fig. 6a) and female flies (Fig. 6b).  
207 In accordance with the previous results concerning the function of hOmi in oligomeric  $\alpha$ -Syn-  
208 specific degradation, this result again confirmed that hOmi rescued the  $\alpha$ -Syn-induced  
209 neurotoxicity in  $\alpha$ -Syn *Drosophila*.

210 Human HtrA2/Omi counteracted the  $\alpha$ -Syn-induced developmental defect in *Drosophila* eye

211 It has been previously observed that the expression of  $\alpha$ -Syn in the developing eye causes retinal  
212 degeneration in *Drosophila*<sup>34</sup>. Since  $\alpha$ -Syn-induced retinal degeneration well-represented  $\alpha$ -Syn-  
213 induced neurotoxicity, we crossed the GMR-GAL4 driver line with the  $\alpha$ -Syn, hOmi and hOmi/ $\alpha$ -  
214 Syn *Drosophila* lines to drive the expression of transgenes in the ommatidial unit and selected the  
215 transgene-expressed flies based on the dominant phenotype of the balancer chromosome CyO of  
216 GMR-GAL4. The eye-specific expression of  $\alpha$ -Syn clearly revealed degenerated retina (Fig. 6c,  
217 d). As the  $\alpha$ -Syn *Drosophila* aged from 10 to 40 days, substantial vacuolar changes became  
218 evident, which indicated that  $\alpha$ -Syn acted as an etiological agent for retinal degeneration. In  
219 contrast, co-expression of hOmi with  $\alpha$ -Syn in hOmi/ $\alpha$ -Syn *Drosophila* did not show any retinal  
220 degeneration in either male (Fig. 6c) or female flies (Fig. 6d).

221 Additionally, the expression of  $\alpha$ -Syn led to developmental defects of the eyes, showing a loss  
222 of general retinal tissue integrity and roughness of the eye (Fig. 7). Serious eye defects were  
223 observed in both male and female  $\alpha$ -Syn *Drosophila*, and the eye defects became more serious as  
224 the flies aged (bottom panel of Fig. 7a, b). In contrast, hOmi/ $\alpha$ -Syn *Drosophila* did not show any  
225 eye defects and the eye phenotype was equivalent to the normal control (GMR-GAL4) and hOmi  
226 *Drosophila* (Fig. 7a, b). Scanning electron microscopy also revealed serious defects of the  $\alpha$ -Syn  
227 *Drosophila* eye and the normal undamaged eye of hOmi/ $\alpha$ -Syn *Drosophila* (Fig. 7c and 7d).  
228 Ommatidial disarray was significantly increased in  $\alpha$ -Syn *Drosophila* compared with hOmi/ $\alpha$ -  
229 Syn *Drosophila*, hOmi *Drosophila* or the normal control (GMR-GAL4), and the difference  
230 became more evident as the flies increased in age (bottom panel of Fig. 7c, d). Furthermore, the  
231 bristle of the eye of  $\alpha$ -Syn *Drosophila* was predominant and became seriously lost as the flies  
232 aged. However, this phenomenon was not observed in hOmi/ $\alpha$ -Syn *Drosophila*, hOmi *Drosophila*

233 or the normal control (GMR-GAL4) (Fig. 7e, f). This result clearly demonstrated the  
234 neuroprotective role of hOmi in  $\alpha$ -Syn-induced neurodegeneration.

## 235 **DISCUSSION**

236 Dichotomous reports of HtrA2/Omi

237 HtrA2/Omi is a mitochondrial protein with high homology to a bacterial heat shock protein<sup>18, 19</sup>.

238 Therefore, it was speculated that HtrA2/Omi would function similarly to the bacterial protein to

239 protect cells from stress-induced toxicity caused by misfolded proteins. Despite its protective role

240 in bacteria, *in vitro* studies have shown that HtrA2/Omi acts as a pro-apoptotic protein<sup>35</sup>.

241 HtrA2/Omi is released into the cytosol from mitochondria during apoptosis and degrades inhibitor

242 of apoptosis proteins (IAPs) such as XIAP and CIAP1/2<sup>35-37</sup>. The degradation of these IAPs by

243 HtrA2/Omi activates both caspase-dependent and -independent apoptotic pathways<sup>36, 37</sup>.

244 Considering the pro-apoptotic characteristics of HtrA2/Omi, it would be natural to think that

245 HtrA2/Omi could participate in a disease-escalating process rather than a disease-protecting

246 process. However, *in vivo* animal experiments from both mice and insects have shown that

247 HtrA2/Omi does not play a pro-apoptotic role, in contrast to the *in vitro* findings<sup>20, 38</sup>. Rather,

248 HtrA2/Omi is not only dispensable for apoptosis but also allows brains to be maintained a healthy

249 state. This work showed the same basic trend as the previous results of *in vivo* HtrA2/Omi

250 expression experiments. As shown in Fig. 3~6, expression of HtrA2/Omi in the *Drosophila* brain

251 not only maintained the health and integrity of the brain but also increased life span. Thus, hOmi

252 *Drosophila* showed demonstrated that the functions of HtrA2/Omi are essential for maintaining

253 the health of the brain.

254 Although apoptosis is the end of life to cells, some apoptosis is required to maintain the healthy  
255 state of multicellular organisms. In this context, the paradoxical results obtained for HtrA2/Omi *in*  
256 *vitro* and *in vivo* provide an abstruse example of the life process of multicellular organisms.

257 Significance of oligomeric  $\alpha$ -Syn-Specific degradation by HtrA2/Omi in the etiology of PD

258 In accordance with pan-neuronal expression experiments of HtrA2/Omi *in vivo*, the knock-out  
259 mouse of HtrA2/Omi and the natural HtrA2/Omi mutant mouse demonstrated that HtrA2/Omi  
260 functions as a neuroprotective protein to prevent PD<sup>21, 39</sup>. The presence of  
261 mutations/polymorphisms in HtrA2/Omi in sporadic PD patients further solidified the link of  
262 HtrA2/Omi to PD<sup>22</sup>. Due to the functional loss of HtrA2/Omi *in vivo* and clinical observations  
263 showing an association of HtrA2/Omi with PD, HtrA2/Omi was named PARK13 to represent a  
264 PD gene.

265 Because mammalian Omi/HtrA2 binds to PINK1 and the phosphorylation of Omi/HtrA2 is  
266 dependent on PINK1<sup>40</sup>, it has been suggested that HtrA2/Omi functions downstream of the  
267 PINK1/Parkin pathway. However, extensive loss-of-function-based genetic interaction studies  
268 using *Drosophila* have failed to show an association of Omi/HtrA2 either upstream or downstream  
269 of PINK1<sup>31, 41</sup>. Gene interaction studies using mice have also shown that overexpression of Parkin  
270 does not rescue neurodegeneration in the Omi/HtrA2 mutant<sup>42</sup>. These studies clearly indicate that  
271 HtrA2/Omi does not function in the PINK1/Parkin pathway. Although HtrA2/Omi certainly plays  
272 a neuroprotective role to prevent PD, the functional mechanism of HtrA2/Omi has remained  
273 mysterious until now. The gene interaction studies in this work clearly showed that HtrA2/Omi  
274 specifically degraded only the neurotoxic form of  $\alpha$ -Syn, oligomeric  $\alpha$ -Syn, without affecting non-  
275 toxic normal  $\alpha$ -Syn (monomeric  $\alpha$ -Syn).

276 Complete rescue of oligomeric  $\alpha$ -Syn-induced toxicity *in vivo* sheds light on the etiology of  
277 PD. Since PINK1 certainly phosphorylates HtrA2/Omi, there is a possibility that PINK1 may be  
278 involved in the regulation of HtrA2/Omi, although HtrA2/Omi does not function in the  
279 PINK1/Parkin pathway. Thus far, thirteen genes that cause PD have been identified. The  
280 etiopathogenic mechanism of PD involving these genes can be grouped into two pathways:  
281 disruption of PINK1-associated phosphorylation in mitochondria and neurotoxic protein  
282 aggregation associated with  $\alpha$ -Syn. Because both *in vitro* and genetic studies have suggested that  
283 HtrA2/Omi functions downstream of PINK1<sup>26</sup>, our results could provide a key piece of the PD  
284 puzzle that links these two pathways at the molecular level.

285 The evolutionarily conserved function of HtrA2/Omi

286 The results of this study provide new findings about the neuroprotective role of HtrA2/Omi based  
287 on its ability to detoxify neurotoxic oligomeric  $\alpha$ -Syn in PD.  $\alpha$ -Syn is degraded by autophagy and  
288 the proteasome<sup>43</sup>; however, these degradation pathways also degrade non-amyloidogenic  
289 monomeric  $\alpha$ -Syn, indicating that they are not related to the etiopathogenesis of PD. The  
290 oligomeric form of  $\alpha$ -Syn is known to be resistant to all proteases, including proteinase K<sup>44</sup>, and  
291 the clearance mechanism for amyloidogenic  $\alpha$ -Syn has remained unknown. Our results show that  
292 oligomeric  $\alpha$ -Syn is specifically degraded in neurons by HtrA2/Omi to prevent PD. HtrA2/Omi  
293 not only plays a critical role in the prevention of PD, but our results are also in good agreement  
294 with the previous observation that HtrA2/Omi functions as a chaperone to detoxify oligomeric A $\beta$   
295 into monomeric A $\beta$ <sup>20</sup>. Thus, HtrA2/Omi might be a key protein that relieves the stress caused by  
296 various amyloidogenic neuronal proteins such as oligomeric  $\alpha$ -Syn and oligomeric A $\beta$ .

297 It is well-known that the functions of most proteins are evolutionarily conserved. Bacteria have  
298 HtrA that specifically degrades misfolded proteins through its protease activity<sup>45</sup>. The bacterial

299 homolog of HtrA, HtrA2/Omi, functions as a protease to specifically degrade a type of misfolded  
300 protein, *i.e.*, oligomeric  $\alpha$ -Syn. Considering that the original function of HtrA was to degrade  
301 misfolded protein through its protease activity, it is very interesting to note that the function of the  
302 mammalian version of HtrA, HtrA2/Omi, is to remove oligomeric  $\alpha$ -Syn through its protease  
303 activity. Because oligomeric  $\alpha$ -Syn is the misfolded version of native  $\alpha$ -Syn, the original function  
304 of HtrA seems to be perfectly conserved in mammals.

## 305 **MATERIALS AND METHODS**

### 306 Reagents and antibodies

307 The reagents used in all experiments and antibodies used for western blot or immunohistochemical  
308 analysis are listed in the Supplementary Information Table S1.

### 309 $\alpha$ -Syn *Drosophila melanogaster* and driver lines for transgene expression

310 The  $\alpha$ -Syn Transgenic fly UAS- $\alpha$ -Syn was purchased from the Bloomington *Drosophila* stock  
311 center (FBst0008146), and the transgenic hOmi *Drosophila* was created in this work. The driver  
312 line elav-GAL4 of *Drosophila melanogaster* (FBst0000458) was used for pan-neuronal  
313 expression of transgenes, and the driver line GMR-GAL4 of *Drosophila melanogaster*  
314 (FBti0002994) was used to express transgenes in the eye.

### 315 Recombinant hOmi protein expression and purification

316 The plasmid construct encoding hOmi (134-458) was generated using the pET28a<sup>+</sup> vector  
317 (Novagen Merck Millipore, cat# 69864-3CN). *E. coli* BL21 (DE3) pLysS (Stratagene California,  
318 cat# CMC0018) was transfected with the construct by electroporation. A single colony of *E. coli*  
319 BL21 (DE3) pLysS-pET28a<sup>+</sup>-HtrA2/Omi was grown at 37°C/250 rpm in 1 L LB medium

320 containing 50  $\mu\text{g}/\text{mL}$  until the OD reached  $\sim 0.8$ . One millimole of IPTG was added to the culture,  
321 followed by further culture for 5 hr at  $20^\circ\text{C}/250$  rpm to induce protein expression. After induction  
322 of heterologous protein, the bacterial cells were centrifuged at  $6,000 \times g$  for 15 min and stored at  
323 either  $-20^\circ\text{C}$  or at  $-80^\circ\text{C}$  until further use. The harvested bacterial pellet from the 1-L culture was  
324 washed once with PBS and resuspended in 20 mL of native cell lysis buffer A (50 mM Tris-HCl,  
325 pH 8.0, 150 mM NaCl, 2.5 mM EDTA, 0.5% Triton X-100, 4 mM  $\text{MgCl}_2$ , 50  $\mu\text{g}/\text{mL}$  DNase I, 0.5  
326 mg/mL lysozyme and protease inhibitor cocktail (Roche Applied Science, cat# 11836153001)).  
327 After incubation at room temperature for 30 min, the lysate was subjected to sonication 10 times  
328 for 10 sec with a burst speed of 6 at high intensity with a 1 min cooling period on ice using the  
329 ultrasonic homogenizer (Bandelin Sonopuls HD 2070, Berlin, Germany). Following sonication,  
330 20 mL of denaturing buffer B (50 mM Tris-HCl, pH 8.0, 10 M urea, 500 mM NaCl and 20 mM  
331 imidazole) was added to the above bacterial cell lysate, followed by sonication 10 times for 10 sec  
332 with a burst speed of 6 at high intensity with a 1 min cooling period on ice. Thereafter, the bacterial  
333 cell lysate was centrifuged at  $20,000 \times g$  for 1 hr at  $4^\circ\text{C}$ , and the supernatant was allowed to  
334 solubilize at room temperature overnight with constant stirring on a magnetic stirrer. The  
335 solubilized protein solution was centrifuged at  $20,000 \times g$  for 1 hr to remove the insoluble materials,  
336 followed by an incubation at  $4^\circ\text{C}$  for 1 hr with gentle agitation to bind to a 5-mL Ni-NTA agarose  
337 affinity column (Invitrogen, cat# R90101) pre-equilibrated with 30 mL of protein denaturing  
338 buffer C (50 mM Tris-HCl, pH 8.0, 5 M urea, 300 mM NaCl) containing 10 mM imidazole. After  
339 binding, the column was washed sequentially with 30 mL and 75 mL of buffer C containing 10  
340 mM and 50 mM imidazole, respectively. The denatured protein was then eluted with three column  
341 volumes of buffer C containing 500 mM imidazole. The Ni-NTA fractions were re-purified on a  
342 PD-10 column (Amersham Pharmacia Biotech, Bellefonte, USA) equilibrated with buffer C,



343 followed by elution with the same buffer according to the manufacturer's instructions. After  
344 determining the protein concentration using the Bradford assay kit (Thermo Fisher Scientific, cat#  
345 23200), the protein was reduced by DTT to a final concentration of 10 mM at 37 °C for 1 hr.  
346 Thereafter, the protein was refolded in optimized protein refolding buffer D (50 mM Tris-HCl, pH  
347 8.5, 500 mM NaCl, 5 mM EDTA, 5 mM GSH, 0.5 mM GSSG, 500 mM arginine and 15% glycerol)  
348 using a rapid-dilution method by maintaining the final protein concentration at 40-50 µg/mL with  
349 constant stirring overnight at 4 °C. Soluble refolded protein was concentrated at 4 °C on an Amicon  
350 stirred cell ultrafiltration unit using an YM-10 membrane (Millipore Sigma Aldrich, cat# Z648078).  
351 Further purification of the refolded protein was performed on a PD-10 column equilibrated with  
352 buffer E (20 mM HEPES, pH 7.5, 100 mM NaCl). The protein was eluted using the same buffer,  
353 and the purified protein concentration was stored at -80 °C in 20% glycerol.

#### 354 Generation of *Drosophila melanogaster* expressing hOmi pan-neuronally

355 The cDNA encoding human *Omi* (*hOmi*) was amplified by PCR from cDNA clones (Invitrogen  
356 Thermo Fisher, Cat# 11262011). The amplified PCR product was digested by flanking restriction  
357 enzyme sites and subcloned into the same restriction sites in the GAL4-responsive pUAST  
358 expression vector, a gift from J.C. Moon<sup>5</sup>. The vector construct was co-injected into *w<sup>1118</sup>*  
359 *Drosophila melanogaster* embryos with a plasmid bearing P element transposase under the control  
360 of the heat shock 70 (*hs-π*) promoter as a source of transposase following standard microinjection  
361 methods (BestGene Inc., Chino Hills, CA). Balanced activator lines were generated using standard  
362 genetic techniques at BestGene Inc. The generation of transgenic flies was confirmed by PCR  
363 using primers to detect the *hOmi* gene and western blot analysis using an anti-HtrA2/Omi antibody  
364 (Supplementary Information, Fig. S4). The transgenic hOmi *Drosophila* line was heterozygous for

365 the dominantly marked CyO balancer chromosome carrying a dominant mutation, CyO, which  
366 causes curly wings.

367 Generation of *Drosophila melanogaster* co-expressing hOmi and  $\alpha$ -Syn pan-neuronally

368 Female *Drosophila* model of Parkinson's disease ( $\alpha$ -Syn *Drosophila*, FBst0008146) was mated  
369 with male hOmi *Drosophila* which maintains hOmi with CyO balancer chromosome. In the F1  
370 generation, the flies were sorted based on the dominant phenotypes of the balancer chromosome  
371 CyO and selected *+hOmi;  $\alpha$ -Syn/+* flies. The first filial *+hOmi;  $\alpha$ -Syn/+* flies were crossed with  
372 each other to generate various genotypes. By genotyping the progenies born from a male fly and a  
373 female fly of the F2 generation, homozygous *x/y; hOmi/hOmi;  $\alpha$ -Syn/ $\alpha$ -Syn* *Drosophila*  
374 *melanogaster* were identified. The identified homozygous *x/y; hOmi/hOmi;  $\alpha$ -Syn/ $\alpha$ -Syn*  
375 *Drosophila melanogaster* were maintained by crossing them with each other. The homozygous  
376 *hOmi/hOmi;  $\alpha$ -Syn/ $\alpha$ -Syn* male *Drosophila melanogaster* was crossed with 3~4 female *elav-Gal4*  
377 virgin *Drosophila melanogaster* to produce *Drosophila melanogaster* with pan-neuronal co-  
378 expression of hOmi and  $\alpha$ -Syn. After 48 hrs of breeding, the flies were transferred to a fresh tube.  
379 The presence of the *hOmi* and  *$\alpha$ -Syn* genes was observed in the progeny. The genotypes of the  
380 *Drosophila* lines were detected by PCR using EF Taq Polymerase (Solgent, cat# SEF 16-R250)  
381 following the manufacturer's suggestion, in which 5  $\mu$ L EF Taq buffer, 1  $\mu$ L NTP, 0.5  $\mu$ L forward  
382 primer (10 pmol/ $\mu$ L), and 0.5  $\mu$ L reverse primer (10 pmol/ $\mu$ L) together with 50 ng genomic DNA  
383 in ddH<sub>2</sub>O water to 50  $\mu$ L made up the PCR mix. *Drosophila* genomic DNA was isolated using  
384 DNAzol (Invitrogen, cat# 10503-027). After the initial denaturation at 95°C for 5 min, PCR was  
385 carried out by denaturation at 95°C for 30 sec, annealing at 57°C for genotyping  *$\alpha$ -Syn*, 65°C for  
386 genotyping *hOmi* for 45 seconds and extension at 72°C for 1 min. After completion of 34 cycles,

387 a final extension of 10 minutes was applied. The PCR products were confirmed by agarose gel  
388 electrophoresis using loading star (Dyne Bio, cat# A750) and an 100-bp DNA ladder (Dyne Bio,  
389 cat# A751).  $\alpha$ -Syn F primer: 5'-TGT AGG CTC CAA AAC CAA GG-3'; R primer: 5'-GCT CCC  
390 TCC ACT GTC TTC TG-3' and hOmi F primer: 5'- GTC GCC GGA TCC ATG CGC TAC ATT-  
391 3' R primer: 5'-GAG CTC TCG AGT CAT TCT GTG ACC-3'.

#### 392 Mouse Model

393 This mouse study was carried out in strict accordance with the recommendations of the Guide for  
394 the Ethics Committee of Chonbuk National University Laboratory Animal Center. The protocol  
395 was approved by the Ethics Committee of Chonbuk National University Laboratory Animal Center  
396 (Permit Number: CBU 2012-0040). All efforts were made to minimize suffering. The C57BL/6J-  
397 mnd2 mice (RRID: IMSR\_JAX:004608) carrying a mutation at S276C in HtrA2/Omi, a Parkinson  
398 model mouse, were obtained from the Jackson Laboratory (Bar Harbor, Maine). Homozygous  
399 (mnd2/mnd2), heterozygous (mnd2/+) and wild-type mice were obtained by crossing mnd2  
400 heterozygous (mnd2/+) mice. The genotypes of the mice were identified by PCR.

#### 401 SDS-PAGE and Western blotting

402 The protein samples were mixed with NuPAGE 4  $\times$  LDS sample buffer (Invitrogen, cat# NP007),  
403 heated at 95°C for 5 min and run on a 4-12% Bis-Tris gradient gel (Invitrogen, cat# NP#00322).  
404 The proteins were visualized by staining with Coomassie blue.

405 For western blotting, the SDS-PAGE gels were transferred to PVDF membranes (Thermo  
406 Fisher Scientific, cat# 88018). After blotting, the PVDF membranes blocked with 5% non-fat dry  
407 milk (Bio-Rad Laboratories, cat# 170-6404) in TBST (TBS with 0.05% Tween and 0.1% Triton  
408 X-100) for 2 hrs at room temperature. The membranes were washed with TBST and incubated  
409 overnight at 4°C after adding mouse anti- $\alpha$ -Syn (Abcam, cat# Ab1903) at a 1:2000 dilution or

410 mouse anti-HtrA2/Omi antibody (BD Biosciences, cat# ABIN121159) at a 1:2000 dilution. The  
411 membranes hybridized to the primary antibody were washed with TBST, followed by incubation  
412 for 2 hrs at room temperature after addition of a horseradish peroxidase-conjugated goat anti-  
413 mouse IgG (H+L) antibody (1:3000) (Promega Corporation, cat# W4021). After washing with  
414 TBST, the chemiluminescent substrate, Immun-Star<sup>TM</sup> Western CTM Kit (Bio-Rad Laboratories,  
415 cat# 170-5061), was added to the membranes, and images were captured with an XRS camera  
416 equipped with a Bio-Rad Quantity One imaging system. The stock solutions of primary (anti- $\alpha$ -  
417 Syn and anti-HtrA2/Omi) and secondary antibodies (goat anti-mouse) were diluted with antibody  
418 dilution buffer (TBST-Triton X-100 with 0.5% BSA).

#### 419 *In vitro* enzymatic assay of HrA2/Omi

420 Commercially purchased human recombinant  $\alpha$ -Syn protein (r-Peptide, cat# S-1001-1) was used  
421 in this work. For the preparation of oligomeric  $\alpha$ -Syn, human recombinant monomeric  $\alpha$ -Syn was  
422 diluted in NaP buffer, pH 7.4, to a final concentration of 10  $\mu$ g/mL and incubated at 37°C. Ten  
423 microliters of recombinant hOmi (10  $\mu$ g/mL in 50 mM sodium phosphate buffer, pH 7.4) produced  
424 in *E. coli* BL21 (DE3) pLysS-pET28a+ was incubated for 30 min at room temperature prior to  
425 addition of the same volume of human recombinant  $\alpha$ -Syn protein (10  $\mu$ g/mL). The reaction  
426 mixture was incubated at 37°C, 39°C and 41°C each. UCF-101 (Merck Millipore, cat# 496150),  
427 and a hOmi specific inhibitor was added to the reaction mixtures if necessary. See the  
428 Supplementary information for detailed methods.

429 For further degradation analysis, oligomers and monomers were purified from *in vitro*  
430 oligomerized  $\alpha$ -Syn protein using a PD-10 column using Sephadex<sup>®</sup> G-25M resin (Sigma Aldrich,  
431 cat# G25150) according to the manufacturer's suggestions. Briefly, the dry powder of Sephadex  
432 was swollen in water overnight prior to use at 4°C. A 1-mL micropipette tip was used for bedding,

433 and the opening of the pipette was plugged with glass wool (Sigma Aldrich, cat# 20411). The  
434 column was gently poured down the side of the pipette. The protein was eluted with sodium  
435 phosphate buffer. The purity of the purified monomeric and oligomeric  $\alpha$ -Syn was checked by  
436 western blotting using a mouse anti- $\alpha$ -Syn antibody (Abcam, cat# Ab1903). Thereafter, following  
437 the same procedure, an equal volume of purified  $\alpha$ -Syn oligomer or monomer, 10  $\mu$ g/mL, was  
438 incubated with the recombinant hOmi. The reaction mixtures were analyzed by western blotting  
439 using a mouse anti- $\alpha$ -Syn antibody. See the Supplementary information for SDS-PAGE & Western  
440 blot detailed methods.

#### 441 Enzymatic kinetics of HtrA2/Omi using ThT

442 To assess the enzymatic kinetics of hOmi, 5  $\mu$ M of oligomeric  $\alpha$ -Syn was incubated with different  
443 concentration of hOmi (0 nM, 10 nM, 50 nM, and 100 nM) in 150  $\mu$ L of 10  $\mu$ M ThT (Sigma  
444 Aldrich, cat# 2390-54-7) solution at room temperature using sealed 96-well plates. The ThT  
445 fluorescence intensity of each sample was measured at 485~540 nm every 5 min using an iMark<sup>TM</sup>  
446 microplate reader (Bio-Rad, Hercules, CA). The ThT fluorescence was also measured to obtain  
447 the Lineweaver-Burk plot. The plot of the reactions was used to calculate  $K_m$  and  $V_{max}$  values for  
448 hOmi.

#### 449 Cell viability assay

450 The cell viability was evaluated using the Cell Counting Kit-8 (Sigma Aldrich, cat # 96992).  
451 Primary mouse neurons were harvested, and  $2 \times 10^5$  neurons were plated in 24-well polystyrene  
452 plates. The plates were incubated at 37°C for 24 hrs for neuronal attachment. After 24 hrs, primary  
453 mouse neurons were treated with  $\alpha$ -synuclein. The plates were then incubated at 37°C for 3 hrs,  
454 24 hrs and 48 hrs. After incubation, 10  $\mu$ L of the reaction solution was added to each well and

455 incubated for 4 hr at 37°C according to the manufacturer's instructions. The absorbance of each  
456 well was then measured at 450 nm using a microplate reader (Bio-Rad Laboratories, Hercules,  
457 California). All experiments were repeated at least three times.

458 Histological examinations of the brains of mice and *Drosophila*

459 Brains of four-week-old mnd2/mnd2 mice and age-matched control mice were removed and fixed  
460 by transcardial perfusion with ice-cold PBS followed by 4% paraformaldehyde in PBS.  
461 Subsequently, those were post-fixed in the same fixative for 4 hrs at 4°C and incubated overnight  
462 at 4°C in 30% sucrose in PBS. For the *Drosophila* experiment, fly heads were fixed in 10% neutral-  
463 buffered formalin. The fixed mouse brains and fly heads were embedded in paraffin and sliced  
464 into 4- $\mu$ M-thick sections on a freezing microtome machine. The sections were deparaffinized with  
465 xylene, rehydrated with a descending series of diluted ethanol and water, and permeabilized with  
466 1% Triton X-100 in TBS for 30 min at RT. Antigens in the sections were retrieved with 10 mM  
467 sodium citrate buffer (pH 6.0) for 20 min at 85°C and subsequently blocked with 10% normal goat  
468 serum (Sigma Aldrich, cat# G9023) in TBS containing 1% BSA and 0.025% Triton X-100 at RT  
469 for 10 hrs. To observe the co-localization of  $\alpha$ -Syn and hOmi in mouse brain, the sections were  
470 double-stained at 4°C with a mouse anti- $\alpha$ -Syn antibody (Abcam, cat# Ab1903) and a rabbit anti-  
471 HtrA2/Omi antibody (1:200) (Abcam, cat# Ab64111). For the *Drosophila* brain, however, the  
472 sections were double-stained at 4°C with mouse anti- $\alpha$ -Syn antibody ASy05 (1:400) (Agricera  
473 antibodies, cat# AS132718) and a rabbit anti-HtrA2/Omi antibody (1:400) (Abcam, cat# Ab64111).  
474 The sections were sequentially washed 3 times for 10 min with TBST (TBS and 0.20% Tween-  
475 20), 2 times for 5 min with TBS-Triton X-100 (TBS and 0.025% Triton X-100) and one time for  
476 10 min with TBST. To suppress endogenous peroxidase activity, the sections were incubated with  
477 3% hydrogen peroxide (H<sub>2</sub>O<sub>2</sub>) in 40% methanol in TBS for 20 min. After washing, all the primary

478 antibodies were detected by incubation with their corresponding secondary antibodies (1:400),  
479 Alex Fluor 488-conjugated goat anti-mouse IgG (H + L) (Molecular Probes, cat# A11029) and  
480 Alexa Fluor 568-conjugated goat anti-rabbit IgG (H + L) (Molecular Probes, cat# A11011), at RT  
481 for 2 hrs in a dark humidified environment. The stock solutions of primary and secondary  
482 antibodies were diluted in antibody dilution buffer (2% goat serum, 1% BSA and 0.025% Triton  
483 X-100 in TBS). After washing 5 times for 10 min with TBST, the slides were sealed with aqueous  
484 mounting medium, and confocal images were obtained with a Carl Zeiss LSM510 Meta  
485 microscope.

486 For immunoperoxidase staining, permeabilized slice sections, prepared as described above,  
487 were incubated in 10 mM sodium citrate buffer with boiling for 5 min. Endogenous peroxidase  
488 was blocked using an endogenous peroxidase blocking buffer (3% H<sub>2</sub>O<sub>2</sub> and 40% methanol in  
489 TBS), followed by 10% horse serum (Sigma Aldrich, cat# H1270) and 1% BSA with 0.025%  
490 Triton X-100. After washing, the sections were incubated with avidin and biotin (Vector  
491 Laboratories Inc., cat# SP-2001), followed by primary antibody at 4°C for 16 hrs and secondary  
492 antibody for 2 hrs at room temperatures. The antibody-treated slides were incubated with ABC  
493 reagents (Vector Laboratories Inc., cat# PK-6100) for 30 min at room temperature. Finally, they  
494 were stained with DAB substrate (Vector Laboratories Inc., cat# SK-4105).

495 The tissue integrity and neurodegeneration of the brains and eyes of *Drosophila* were  
496 visualized after hematoxylin and eosin staining (H&E staining). The H&E staining procedure was  
497 performed according to a previously described method<sup>46</sup>.

498 Immunocytochemical confocal microscopic assay of mouse neurons

499 To observe the localization of  $\alpha$ -Syn, HtrA2/Omi and mitochondria, primary neurons were isolated  
500 from the substantia nigra and striatum and cultured to 60% confluency using a standard primary

501 cell culture method<sup>47</sup>. After staining with Mito Tracker Red CMXRos (Molecular Probes, cat#  
502 M7512) according to the manufacturer's instructions, the neurons were fixed with 4%  
503 paraformaldehyde in PBS for 20 min and permeabilized with 0.5% Triton X-100 in TBS for 30  
504 min at room temperature. The neurons were then blocked for immunohistochemical analysis. After  
505 washing with TBST, the neurons were treated overnight at 4°C with a rabbit anti- $\alpha$ -Syn antibody  
506 (1:100) (Abcam, cat# Ab51252) or a rabbit anti-HtrA2/Omi antibody (1:100) (Abcam, cat#  
507 Ab64111). After washing, the neurons were treated with FITC-conjugated goat anti-rabbit IgG (H  
508 + L) antibody (1:200) (Abcam, cat# Ab6717) for 2 h at room temperature.

509 To detect the localization of  $\alpha$ -Syn, HtrA2/Omi and ER, neurons fixed with 4%  
510 paraformaldehyde in PBS were permeabilized and blocked as described above. After washing with  
511 TBST, the neurons were double-stained overnight at 4°C with a rabbit anti- $\alpha$ -Syn antibody (1: 100)  
512 or a rabbit anti-HtrA2/Omi antibody (1:100) together with the ER marker mouse anti-PDI (1:100)  
513 antibody (Abcam, cat# Ab5484). After washing, the anti- $\alpha$ -Syn and anti-HtrA2/Omi antibodies  
514 were detected with secondary FITC-conjugated goat anti-rabbit IgG (H + L) antibody (1:400)  
515 (Abcam, cat# Ab6717), and the anti-PDI antibody was detected with Texas Red-conjugated goat  
516 anti mouse IgG (H + L) antibody (1:400) (Abcam, cat# Ab6787). The stock solutions of primary  
517 and secondary antibodies were diluted in antibody dilution buffer (2% goat serum, 1% BSA and  
518 0.025% Triton X-100 in TBS). Confocal images were obtained with a Carl Zeiss LSM510 Meta  
519 microscope.

520 Preparation of protein extracts from the substantia nigra and striatum

521 Four-week-old *mnd2/mnd2*, *mnd2/+* and age-matched control mice were sacrificed to isolate the  
522 substantia nigra and striatum surgically. Total proteins were extracted from the substantia nigra  
523 and striatum of each mouse using a total protein extraction kit (Merck Millipore, cat# 2140)



524 according to the manufacturer's protocol. Total protein extracts of equal amounts from each  
525 sample were subjected to western blot analysis with a mouse anti- $\alpha$ -Syn antibody (Abcam, cat#  
526 Ab1903).

527 Isolation of primary neurons from the substantia nigra and striatum

528 The substantia nigra and striatum were obtained surgically from four-week-old wild-type C57BL/6  
529 mice to investigate the localization of  $\alpha$ -Syn and HtrA2/Omi. The substantia nigra and striatum  
530 were minced into small pieces in dissection medium (DMEM/F-12, 32 mM glucose, 1%  
531 penicillin/streptomycin, and 0.5 mM L-glutamine), followed by the addition of 2 mL of HBSS and  
532 centrifugation at  $300 \times g$  for 5 min. The pellet was treated with 2 mg/mL papain in HBSS and 200  
533  $\mu$ g/mL DNase I solution for 30 min in a 30°C water bath with a platform rotating at 150 rpm. The  
534 tissue was gently triturated by the addition of dissection medium to the single cell suspension and  
535 passage through a cell strainer (BD Falcon, cat# 08-771-19). The neuronal pellets were washed  
536 twice with ice-cold dissection medium by centrifugation at  $300 \times g$  for 7 min and resuspended in  
537 pre-warmed Neurobasal/B27 growth medium supplemented with 1% penicillin/streptomycin, 0.5  
538 mM L-glutamine, 10 ng/mL FGF2 (Sigma Aldrich, cat# SRP4038), and 12.5 mM NaCl. The cells  
539 were seeded at a density of 120 cells/mm<sup>2</sup> on poly-D-lysine and laminin-coated multiwell  
540 chambered cover slips (Grace Bio-Labs, Bend, Oregon) and incubated in a humidified incubator  
541 at 37°C in an atmosphere of 5% CO<sub>2</sub> and 95% air for 1 hr for neuronal attachment. After 1 hr, the  
542 spent medium was aspirated, followed by the addition of fresh growth medium and further  
543 incubation. Half of the spent medium was replaced every 3 days with the same volume of fresh  
544 pre-warmed growth medium containing 20 ng/mL FGF2.

545 Preparation of *Drosophila* and mouse brain homogenates

546 Fly heads were homogenized using an ultrasonicator at 4°C for 6 min at 40 kHz in 3  $\mu$ L of total  
547 protein extraction kit TM buffer containing 0.1% SDS (Millipore, cat# 2140). The homogenized  
548 samples were centrifuged at 17,000  $\times$  g for 1 min at RT to remove the debris. The supernatant was  
549 collected and centrifuged again under the same conditions to collect the fresh supernatant.

550 Four-week-old *mnd2/mnd2* mice, *mnd2/+* mice and aged match controls were sacrificed, and  
551 the brain tissues were chopped into small pieces, followed by the addition of 1 mL of total protein  
552 extraction kit TM buffer containing 0.1% SDS (Millipore, cat# 2140) to 0.2 g of brain samples.  
553 Samples were homogenized, and total proteins were isolated as described above.

#### 554 Pan-neuronal and eye-specific expression of transgenes in *Drosophila*

555 Pan-neuronal expression of transgenes was achieved by crossing virgin female flies (driver line)  
556 carrying *elav-Gal4* on their X chromosome with transgenic flies. Eye-specific expression of  
557 transgenes was achieved by crossing virgin female flies (driver line) carrying *GMR-GAL4* on their  
558 X chromosome with transgenic flies. These flies were maintained at 25°C and, immediately after  
559 eclosion, sorted for western blotting, IHC, and survival and locomotion assays.

#### 560 Survival assay

561 Flies were maintained on standard cornmeal-sucrose-yeast-agar-molasses medium at 25°C in a 60%  
562 humidified incubator (Han Baek Scientific Co., Seoul, South Korea) with a 12-hr light/dark cycle.  
563 Male transgenic flies were mated with virgin female *elav-GAL4* driver flies. Newly eclosed flies  
564 were allowed to mature for 48 hrs, and then the male and female flies were separated into different  
565 jars. Exactly 100 adult female and 100 adult male flies were maintained for the aging experiments.  
566 During maintenance, the flies were transferred to fresh medium every 5 days, and their survival  
567 was recorded. This process was continued until all the flies had died. Non-age-related or non-

568 disease-related death was censored. Analysis of the survival data was performed using the Kaplan-  
569 Meier method<sup>48</sup>.

#### 570 Locomotion assay

571 Transgenic flies were mated and maintained on standard cornmeal-sucrose-yeast-agar-molasses  
572 medium as described above for the locomotion assay. Fifteen flies were anesthetized with CO<sub>2</sub> and  
573 placed in a 15-mL conical tube (SPL life sciences, cat# 51015) capped with cotton. Anesthetized  
574 flies were allowed to recover for 30 min at room temperature before the climbing assay. Flies were  
575 tapped to the bottom of the tube and allowed to climb with video recording for 30 sec. The  
576 experiments were repeated 3 times. After 10~15 sec, the numbers of flies remaining below the 2  
577 mL mark ( $n_{\text{bottom}}$ ) and flies the 10 mL mark ( $n_{\text{top}}$ ) were recorded. The performance index (PI) was  
578 calculated for each group using the following formula:  $PI = 0.5 \times (n_{\text{total}} + n_{\text{top}} - n_{\text{bottom}}) / n_{\text{total}}$ , where  
579  $n_{\text{total}}$  is the total number of flies,  $n_{\text{top}}$  is the total number of flies at the top, and  $n_{\text{bottom}}$  is the total  
580 number of flies at the bottom. If all flies climb to the top of the tube, the score is 1, and if no flies  
581 climb the score is 0<sup>48</sup>.

#### 582 Scanning electron microscopy study

583 Freshly sacrificed flies were dehydrated by serially transferring them into increasing ethanol  
584 concentrations of 30, 40, 50, 60, 70, 80, 90 and 100% for 10 min each at room temperature. The  
585 dehydrated flies were air dried prior to being preserved at -80°C. The dehydrated flies were  
586 mounted on a slide with one eye upward on black tape using colloidal graphite in an isopropanol  
587 base. The flies were fixed in osmium tetroxide and air dried prior to observation. All flies were  
588 placed on a rotating platform to permit orientation under a vacuum and imaged at 180 ×

589 magnification using a JSM-6400 scanning electron microscope (JEOL Ltd. Akishima, Tokyo,  
590 Japan).

#### 591 Statistics and reproducibility

592 All statistical analyses are reported as the mean  $\pm$  SEM, and the significance was calculated using  
593 one-way ANOVA followed by Bonferroni/Tukey multiple tests for individual means using IBM  
594 SPSS statistics 21 software. *P* values less than 0.05 were considered statistically significant. When  
595 representative images are shown, at least three repeats were performed.

#### 596 Data availability

597 All data supporting the findings of this study are available from the corresponding author on  
598 request.

#### 599 **ACKNOWLEDGMENTS**

600 This research was supported by the Brain Research Program through the National Research  
601 Foundation of Korea (NRF) funded by the Ministry of Science, ICT & Future Planning (NRF-  
602 2017M3C7A1044818) and also partially funded by JINIS BDRD Research Institute.

#### 603 **AUTHOR CONTRIBUTIONS**

604 H.J.C. and M.A.M. J. designed the project; H.J.C., M.A.M.J. and M.M.R. designed the  
605 experiments; H.J.C., M.A.M.J., M.M.R., and H.J.K. analyzed results; H.J.C., M.A.M.J. and M.M.  
606 R. performed the experimental work; H.J.C., M.A.M.J., H. J.K. and S.T.H. wrote the manuscript.  
607 H. J.K. and S.T.H. supervised the project.

#### 608 **ADDITIONAL INFORMATION**

609 **Supplemental Information** accompanies this paper at <https://doi.org/10.1038/>

610 **Competing interest:** The authors declare no competing interests.

## 611 **REFERENCES**

- 612 1. Wang, Q. et al. Elevated Hapln2 expression contributes to protein aggregation and  
613 neurodegeneration in an animal model of Parkinson's disease. *Front. Aging Neurosci.* **8**, 197  
614 (2016).
- 615 2. Dauer, W. & Przedborski, S. Parkinson's disease: mechanisms and models. *Neuron* **39**, 889-  
616 909 (2003).
- 617 3. Yasuda, T., Nakata, Y., Choong, C.-J. & Mochizuki, H. Neurodegenerative changes initiated  
618 by presynaptic dysfunction. *Transl. Neurodegener.* **2**, 16 (2013).
- 619 4. Kanaan, N. M. & Manfredsson, F. P. Loss of functional alpha-synuclein: a toxic event in  
620 Parkinson's disease? *J. Parkinsons Dis.* **2**, 249-267 (2012).
- 621 5. Park, S. C. et al. Functional characterization of alpha-synuclein protein with antimicrobial  
622 activity. *Biochem. Biophys. Res. Commun.* **478**, 924-928 (2016).
- 623 6. Luk, K. C. et al. Pathological  $\alpha$ -Synuclein Transmission Initiates Parkinson-like  
624 Neurodegeneration in Non-transgenic Mice. *Science* **338**, 949-953 (2012).
- 625 7. Periquet, M., Fulga, T., Myllykangas, L., Schlossmacher, M. G. & Feany, M. B. Aggregated  
626 alpha-synuclein mediates dopaminergic neurotoxicity in vivo. *J. Neurosci.* **27**, 3338-3346  
627 (2007).
- 628 8. Taschenberger, G. et al. Aggregation of  $\alpha$ Synuclein promotes progressive in vivo  
629 neurotoxicity in adult rat dopaminergic neurons. *Acta Neuropathol.* **123**, 671-683 (2012).
- 630 9. Cook, C. & Petrucelli, L. A critical evaluation of the ubiquitin–proteasome system in

- 631        Parkinson's disease. *Biochim. Biophys. Acta.* **1792**, 664-675 (2009).
- 632    10. Ebrahimi-Fakhari, D., McLean, P. J. & Unni, V.K. Alpha-synuclein's degradation in vivo:  
633        Opening a new (cranial) window on the roles of degradation pathways in Parkinson disease.  
634        *Autophagy* **8**, 281-283 (2012).
- 635    11. Pan, T., Kondo, S., Le, W. & Jankovic, J. The role of autophagy-lysosome pathway in  
636        neurodegeneration associated with Parkinson's disease. *Brain* **131**, 1969-1978 (2008).
- 637    12. Wang, C. & Wang, X. The interplay between autophagy and the ubiquitin-proteasome system  
638        in cardiac proteotoxicity. *Biochim. Biophys. Acta.* **1852**, 188–194 (2015).
- 639    13. Ebrahimi-Fakhari, D., McLean, P. J. & Unni, V. K. Alpha-synuclein's degradation in vivo:  
640        Opening a new (cranial) window on the roles of degradation pathways in Parkinson disease.  
641        *Autophagy* **8**, 281-283 (2012).
- 642    14. Ingelsson, M. Alpha-Synuclein Oligomers—Neurotoxic Molecules in Parkinson's Disease and  
643        Other Lewy Body Disorders. *Front. Neurosci.* **10**, 408 (2016).
- 644    15. Kokhan, V. S., Afanasyeva, M. A. & Van'kin, G. I.  $\alpha$ -Synuclein knockout mice have cognitive  
645        impairments. *Behav. Brain. Res.* **231**, 226-230 (2012).
- 646    16. Roostaei, A., Beaudoin, S., Staskevicius, A. & Roucou, X. Aggregation and neurotoxicity of  
647        recombinant alpha-synuclein aggregates initiated by dimerization. *Mol. Neurodegener.* **8**, 5  
648        (2013).
- 649    17. Wan, O. W. & Chung, K. K. K. The Role of Alpha-Synuclein Oligomerization and  
650        Aggregation in Cellular and Animal Models of Parkinson's Disease. *PLoS One* **7**, e38545  
651        (2012).
- 652    18. Clausen, T., Southan, C. & Ehrmann, M. The HtrA Family of Proteases: Implications for  
653        Protein Composition and Cell Fate. *Mol. Cell* **10**, 443–455 (2002).

- 654 19. Lipinska, B., Sharma, S. & Georgopoulos, C. Sequence analysis and regulation of the htrA  
655 gene of Escherichia coli: a sigma 32-independent mechanism of heat-inducible transcription.  
656 *Nucleic Acids Res.* **16**, 10053-10067 (1988).
- 657 20. Liu, M.- L. et al. Omi is a mammalian heat-shock protein that selectively binds and detoxifies  
658 oligomeric amyloid- $\beta$ . *Journal of Cell Science* **122**, 1917-1926 (2009).
- 659 21. Martins, L. M. et al. Neuroprotective role of the Reaper-related serine protease HtrA2/Omi  
660 revealed by targeted deletion in mice. *Mol. Cell Biol.* **24**, 9848-9862 (2004).
- 661 22. Strauss, K. M. et al. Loss of function mutations in the gene encoding Omi/HtrA2 in Parkinson's  
662 disease. *Hum. Mol. Genet.* **14**, 2099-2111 (2005).
- 663 23. Abou-Sleiman, P. M., Muqit, M. M. & Wood, N. W. Expanding insights of mitochondrial  
664 dysfunction in Parkinson's disease. *Nat. Rev. Neurosci.* **7**, 207-219 (2006).
- 665 24. Henchcliffe, C. & Beal, M. F. Mitochondrial biology and oxidative stress in Parkinson disease  
666 pathogenesis. *Nat. Clin. Pract. Neurol.* **4**, 600-609 (2008).
- 667 25. Jones, C. H. et al. Escherichia coli DegP Protease Cleaves between Paired Hydrophobic  
668 Residues in a Natural Substrate: the PapA Pilin. *Journal of Bacteriology* **184**, 5762-  
669 5771(2002).
- 670 26. Yun, J. et al. Loss-of-function analysis suggests that Omi/HtrA2 is not an essential component  
671 of the pink1/parkin pathway in vivo. *J. Neurosci.* **28**, 14500-14510 (2008).
- 672 27. Breydo, L., Wu, J. W. & Uversky, V. N.  $\alpha$ -Synuclein misfolding and Parkinson's disease.  
673 *Biochim. Biophys. Acta.* **1822**, 261-285 (2012).
- 674 28. Ryu, E. J. et al. Endoplasmic reticulum stress and the unfolded protein response in cellular  
675 models of Parkinson's disease. *J. Neurosci.* **22**, 10690-10698 (2002).
- 676 29. Winklhofer, K. F. & Haass, C. Mitochondrial dysfunction in Parkinson's disease. *Biochim.*

- 677 *Biophys. Acta.* **1802**, 29-44 (2010).
- 678 30. Feany, M. B. & Bender, W. W. A *Drosophila* model of Parkinson's disease. *Nature* **404**, 394  
679 (2000).
- 680 31. Todd, A. M. & Staveley, B. E. Pink1 suppresses alpha-synuclein-induced phenotypes in a  
681 *Drosophila* model of Parkinson's disease. *Genome* **51**, 1040-1046 (2008).
- 682 32. Bellani, S. et al. The regulation of synaptic function by  $\alpha$ -synuclein. *Commun. Integr. Biol.* **3**,  
683 106-109 (2010).
- 684 33. Burré, J. The Synaptic Function of  $\alpha$ -Synuclein. *J. Parkinsons Dis.* **5**, 699-713 (2015).
- 685 34. M'Angale, P. G. & Staveley, B. E. Effects of  $\alpha$ -synuclein expression in the developing  
686 *Drosophila* eye. *Dros. Inf. Serv.* **95**, 85-89 (2012).
- 687 35. Martins, L. M. et al. The Serine Protease Omi/HtrA2 Regulates Apoptosis by Binding XIAP  
688 through a Reaper-like Motif. *J. Biol. Chem.* **277**, 439-444 (2002).
- 689 36. Shi, Y. Mechanisms of Caspase Activation and Inhibition during Apoptosis. *Mol. Cell* **9**, 459-  
690 470 (2002).
- 691 37. Srinivasula, S. M. et al. Inhibitor of Apoptosis Proteins Are Substrates for the Mitochondrial  
692 Serine Protease Omi/HtrA2. *J. Biol. Chem.* **278**, 31469-31472 (2003).
- 693 38. Crook, N. E., Clem, R. J. & Miller, L. K. An apoptosis-inhibiting baculovirus gene with a zinc  
694 finger-like motif. *J. Virol.* **67**, 2168-2174 (1993).
- 695 39. Jones, J. M. et al. Loss of Omi mitochondrial protease activity causes the neuromuscular  
696 disorder of *mnd2* mutant mice. *Nature* **425**, 721 (2003).
- 697 40. Plun-Favreau, H. et al. The mitochondrial protease HtrA2 is regulated by Parkinson's disease-  
698 associated kinase PINK1. *Nat. Cell Biol.* **9**, 1243-1252 (2007).
- 699 41. Tain, L. S. et al. *Drosophila* HtrA2 is dispensable for apoptosis but acts downstream of PINK1



- 700 independently from Parkin. *Cell Death Differ.* **16**, 1118-1125 (2009).
- 701 42. Yoshida, T., Mizuta, T. & Shimizu, S. Neurodegeneration in *mnd2* mutant mice is not  
702 prevented by parkin transgene. *Biochem. Biophys. Res. Commun.* **402**, 676-9 (2010).
- 703 43. Webb, J. L., Ravikumar, B., Atkins, J., Skepper, J. N. & Rubinsztein, D. C.  $\alpha$ -Synuclein is  
704 degraded by both autophagy and the proteasome. *J. Biol. Chem.* **278**, 25009-25013 (2003).
- 705 44. Neumann, M. et al. Misfolded proteinase K-resistant hyperphosphorylated  $\alpha$ -synuclein in  
706 aged transgenic mice with locomotor deterioration and in human  $\alpha$ -synucleinopathies. *J. Clin.*  
707 *Invest.* **110**, 1429-1439 (2002).
- 708 45. Cassone, M., Gagne, A. L., Spruce, L. A., Seholzer, S. H. & Sebert, M. E. The HtrA Protease  
709 from *Streptococcus pneumoniae* Digests Both Denatured Proteins and the Competence-  
710 stimulating Peptide. *J. Biol. Chem.* **287**, 38449–38459 (2012).
- 711 46. Chung, H. J., Sharma, S. P., Kim, H. J., Baek, S. H. & Hong, S. T. The resveratrol-enriched  
712 rice DJ526 boosts motor coordination and physical strength. *Sci. Rep.* **6**, 23958 (2016).
- 713 47. Chung, H. J., Hassan, M. M., Park, J. O., Kim, H. J. & Hong, S. T. Manipulation of a quasi-  
714 natural cell block for high-efficiency transplantation of adherent somatic cells. *Braz. J. Med.*  
715 *Biol. Res.* **48**, 392-400 (2015).
- 716 48. White, K. E., Humphrey, D. M. & Hirth, F. The Dopaminergic System in the Aging Brain of  
717 *Drosophila*. *Front. Neurosci.* **4**, 205 (2010).

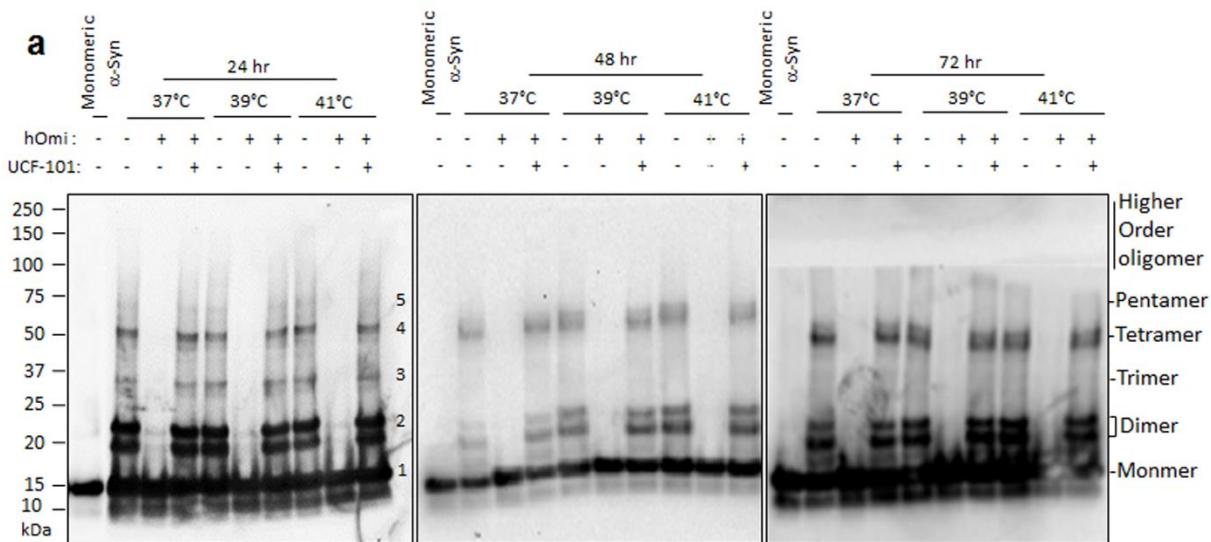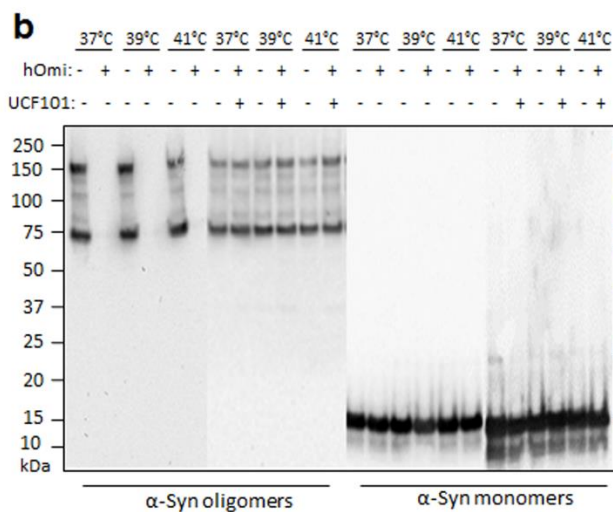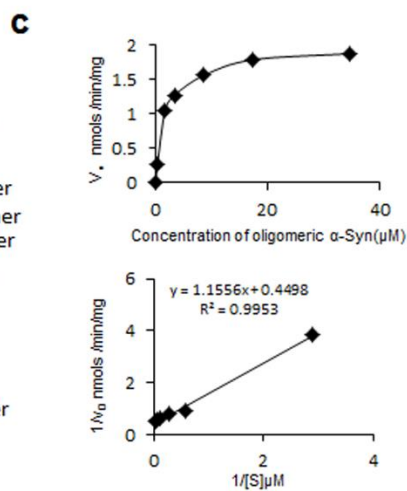

718

719 **Fig. 1** *In vitro* experiment showing that hOmi recognized and degraded specifically oligomeric  $\alpha$ -  
720 Syn . **a** Removal of  $\alpha$ -Syn oligomer by hOmi during the oligomerization of  $\alpha$ -Syn at different  
721 temperatures. Treatment of UCF-101, a hOmi inhibitor, completely inhibited the oligomeric  $\alpha$ -  
722 Syn-specific degradation activity of hOmi. **b** Complete degradation of oligomeric  $\alpha$ -Syn without  
723 affecting monomeric  $\alpha$ -Syn by hOmi at different temperatures but not in the presence of UCF-101.  
724 Treatment of UCF-101, a hOmi inhibitor, completely inhibited the oligomeric  $\alpha$ -Syn-specific  
725 degradation activity of hOmi. **c** The Michaelis-Menten saturation curve (upper panel) and  
726 Lineweaver–Burk plot (lower panel) of hOmi for oligomeric  $\alpha$ -syn. The enzyme kinetic study was  
727 conducted after labeling oligomerized  $\alpha$ -Syn with the oligomer-specific fluorescent dye ThT.

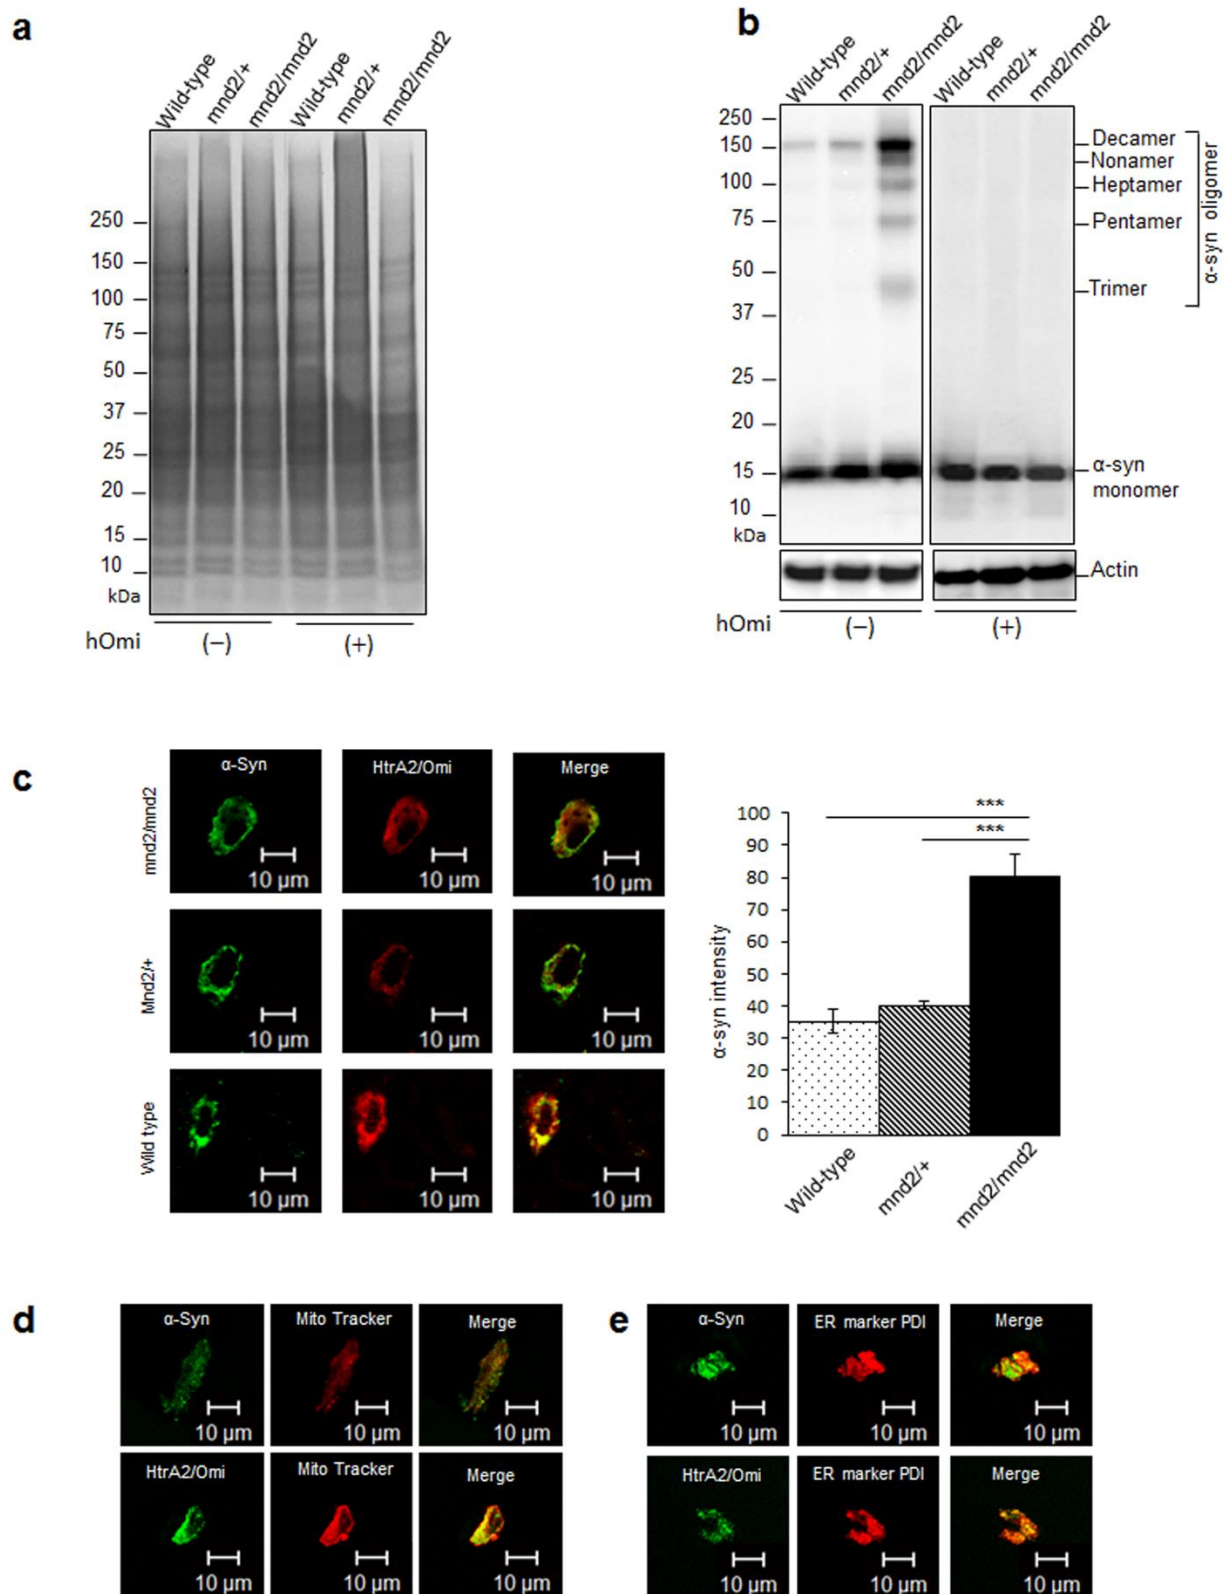

729 **Fig. 2** hOmi specifically recognized and degraded oligomeric  $\alpha$ -Syn in mouse brain. **a** HtrA2/Omi  
730 treatment of total protein extracts of nigrostriatal tissues of wild-type, *mnd2/+* and *mnd2/mnd2*  
731 mice did not show any noticeable degradation by SDS-PAGE. **b** Western blotting with mouse anti-  
732 human  $\alpha$ -Syn revealed a significant accumulation of oligomeric  $\alpha$ -Syn in the nigrostriatal tissues  
733 of *mnd2/mnd2* mice and complete degradation of  $\alpha$ -Syn oligomers after hOmi treatment, without  
734 affecting monomers in the tested mice. **c** Immunohistochemical confocal microscopy of  
735 nigrostriatal tissue of the brains of wild-type, *mnd2/+* and *mnd2/mnd2* mice revealed the co-  
736 localization of  $\alpha$ -Syn (green) and HtrA2/Omi (red), with significantly higher levels of  $\alpha$ -Syn  
737 accumulation in *mnd2/mnd2* mice. Representative images are shown along with the image analysis  
738 graph. **d** Immunostaining microscopy of the neurons in the substantia nigra and striatum showing  
739 the co-localization of  $\alpha$ -Syn (green), HtrA2/Omi (green) and mitochondria (red with Mito Tracker).  
740 Scale bar, 10  $\mu$ M. **e** Immunostaining microscopy of neurons in the substantia nigra and striatum  
741 showing the co-localization of  $\alpha$ -Syn (green), HtrA2/Omi (green) and endoplasmic reticulum (red  
742 with ER marker PDI). Scale bar, 10  $\mu$ M.

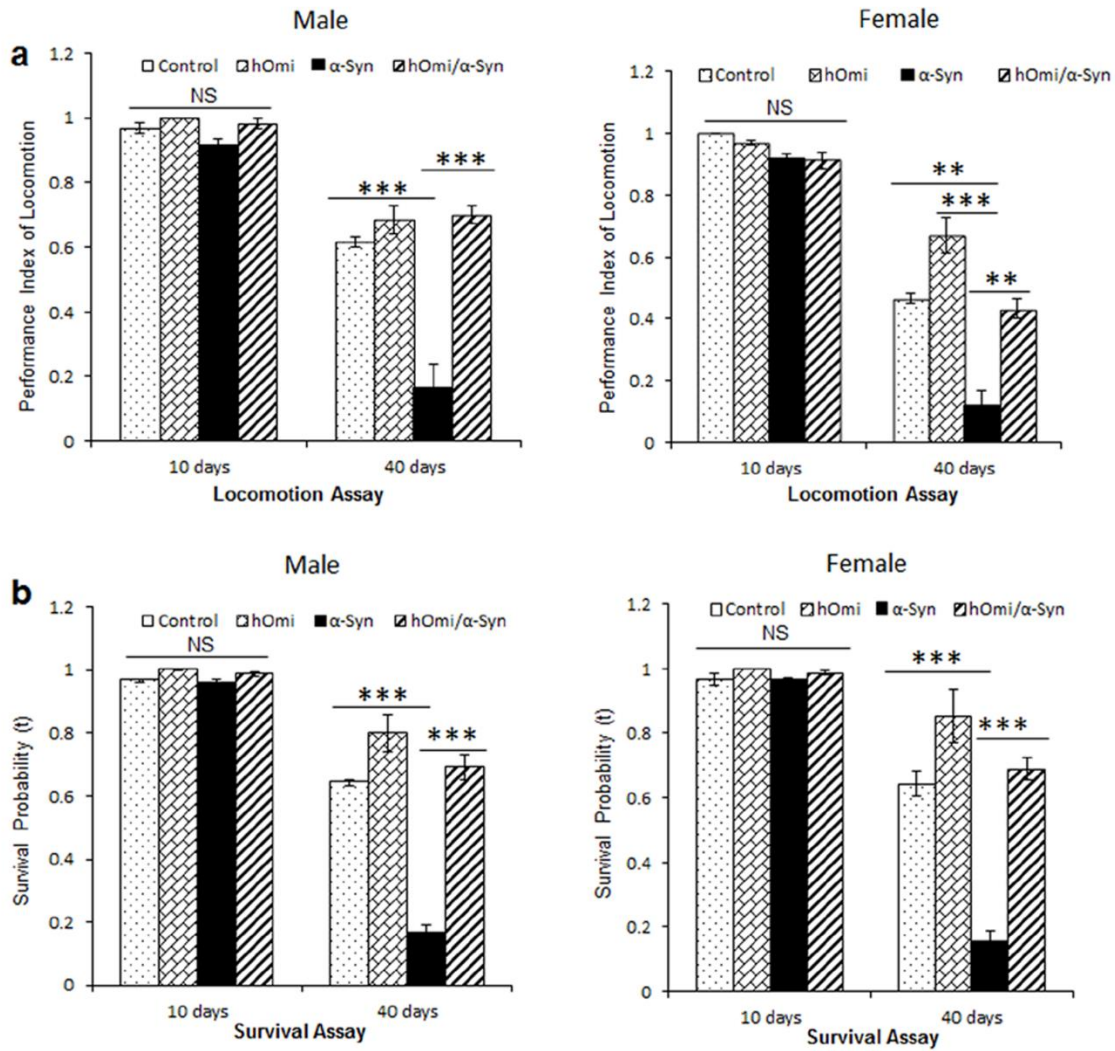

743

744 **Fig. 3** hOmi rescued Parkinsonism in a *Drosophila* Model of Parkinson's Disease. **a** The  
745 locomotion assay in hOmi,  $\alpha$ -Syn, or hOmi/ $\alpha$ -Syn flies measured by climbing ability against  
746 negative geotaxis at young (10 days) and old (40 days) ages. Values are the mean  $\pm$  SEM from  
747 three independent experiments. NS, not significant, \* $p$ <0.05, \*\* $p$ <0.01, \*\*\* $p$ <0.001. **b** The survival  
748 rate of hOmi,  $\alpha$ -Syn, or hOmi/ $\alpha$ -Syn flies at young (10 days) and old (40 days) ages. Values are  
749 the mean  $\pm$  SEM from three independent experiments. NS, not significant, \* $p$ <0.05, \*\* $p$ <0.01,  
750 \*\*\* $p$ <0.001.

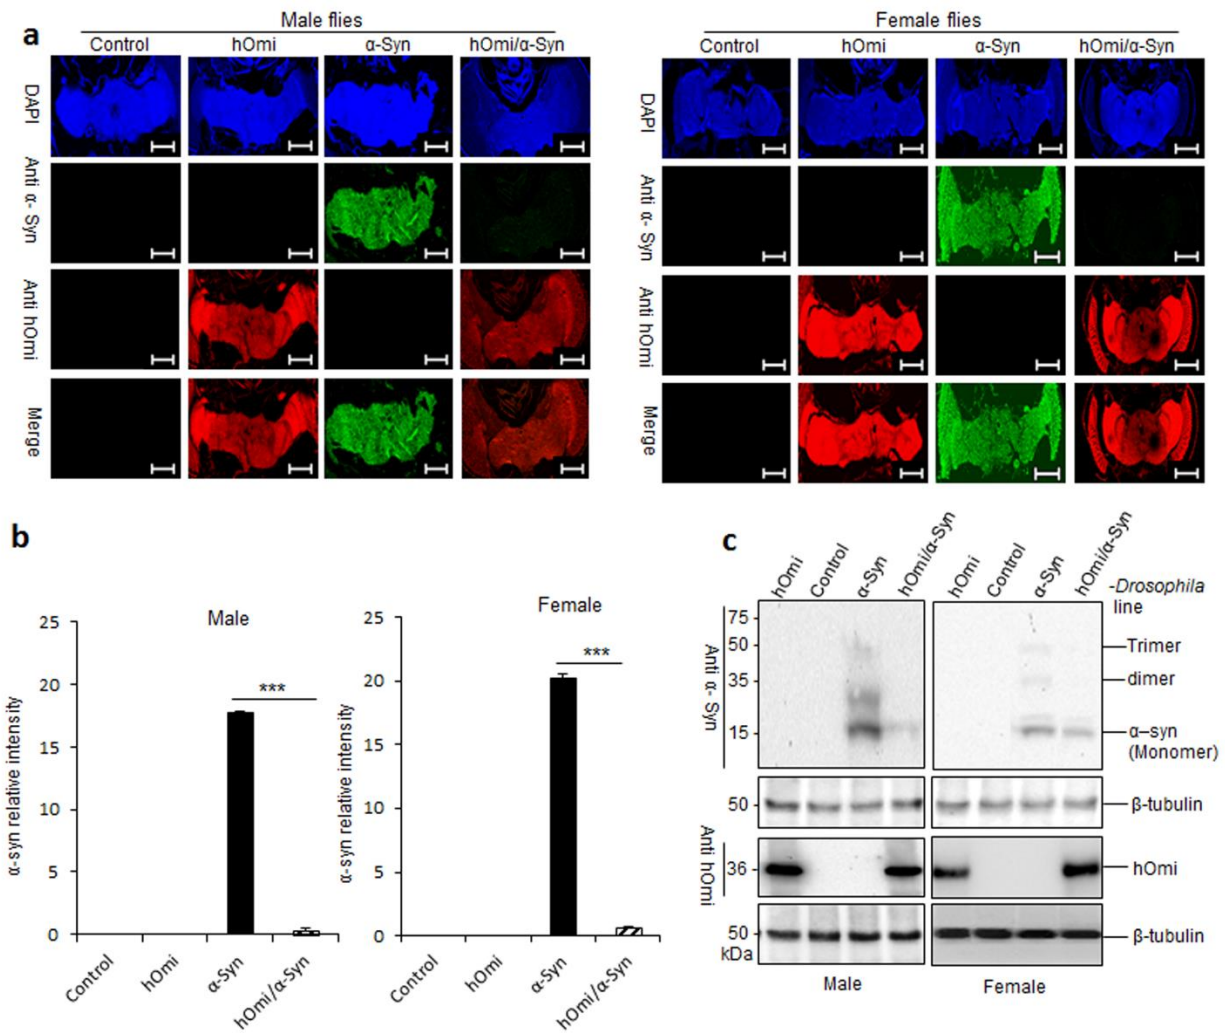

751



752 **Fig. 4** hOmi prevented the accumulation of oligomeric  $\alpha$ -Syn in a *Drosophila* Model of  
753 Parkinson's Disease. **a** Immunohistochemical confocal microscopy of the brains of control flies  
754 and transgenic flies expressing hOmi (indicated in red with anti-hOmi),  $\alpha$ -Syn (indicated in green  
755 with anti- $\alpha$ -Syn) and hOmi/ $\alpha$ -Syn using 40-day-old male (left panel) and female flies (right panel).  
756 The  $\alpha$ -Syn was stained with an oligomeric  $\alpha$ -Syn-specific monoclonal antibody, anti- $\alpha$ -Syn  
757 (ASy05). Scale bar, 100  $\mu$ M. **b** Relative intensity of oligomeric  $\alpha$ -Syn immunofluorescence in the  
758 images in a. Values are the mean  $\pm$  SEM from three independent experiments. \* $p$ <0.05, \*\* $p$ <0.01,  
759 \*\*\* $p$ <0.001. **c** Western blot analysis of  $\alpha$ -Syn and hOmi expression in *Drosophila* brains. The blots  
760 of the brain homogenates from control flies and transgenic flies expressing hOmi,  $\alpha$ -Syn or  
761 hOmi/ $\alpha$ -Syn using 40-day-old male (left panel) and female flies (right panel) were probed with  
762 anti- $\alpha$ -Syn or anti-hOmi.

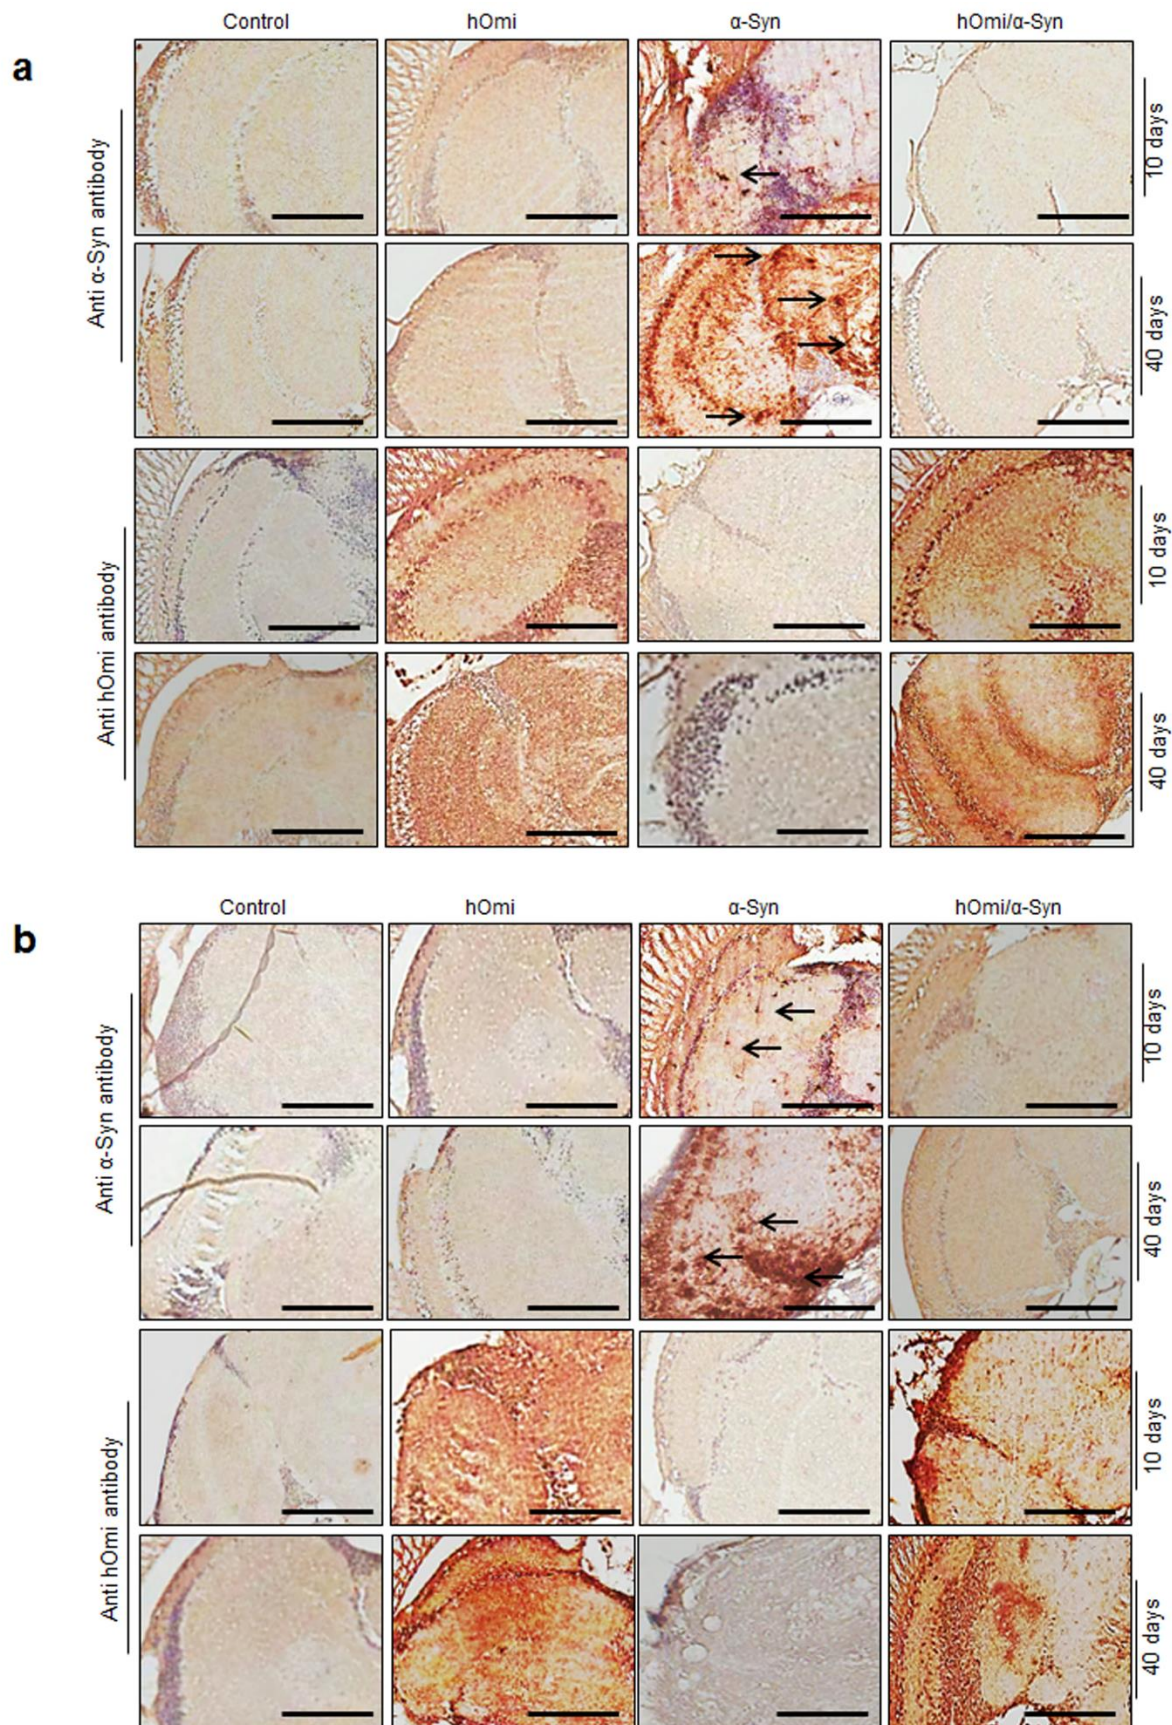

764 **Fig. 5** hOmi prevented the formation of Lewy bodies and maintained brain integrity in a  
765 *Drosophila* Model of Parkinson's Disease. **a** Immunohistochemical staining of the midbrains of  
766 male control flies and transgenic flies expressing hOmi,  $\alpha$ -Syn and hOmi/ $\alpha$ -Syn with either anti-  
767  $\alpha$ -Syn or anti-hOmi antibody, showing Lewy bodies (indicated as arrows) in 10 and 40-day-old  
768 male flies. The  $\alpha$ -Syn was stained with an oligomeric  $\alpha$ -Syn-specific monoclonal antibody, anti- $\alpha$ -  
769 Syn (ASy05). Scale bar, 50  $\mu$ M. **b** Immunohistochemical staining of the midbrains of female  
770 control flies and transgenic flies expressing hOmi,  $\alpha$ -Syn and hOmi/ $\alpha$ -Syn with either anti- $\alpha$ -Syn  
771 or anti-hOmi antibody, showing Lewy bodies (indicated as arrows) in 10 and 40-day-old female  
772 mice. The  $\alpha$ -Syn was stained with an oligomeric  $\alpha$ -Syn-specific monoclonal antibody, anti- $\alpha$ -Syn  
773 (ASy05). Scale bar, 50  $\mu$ M.

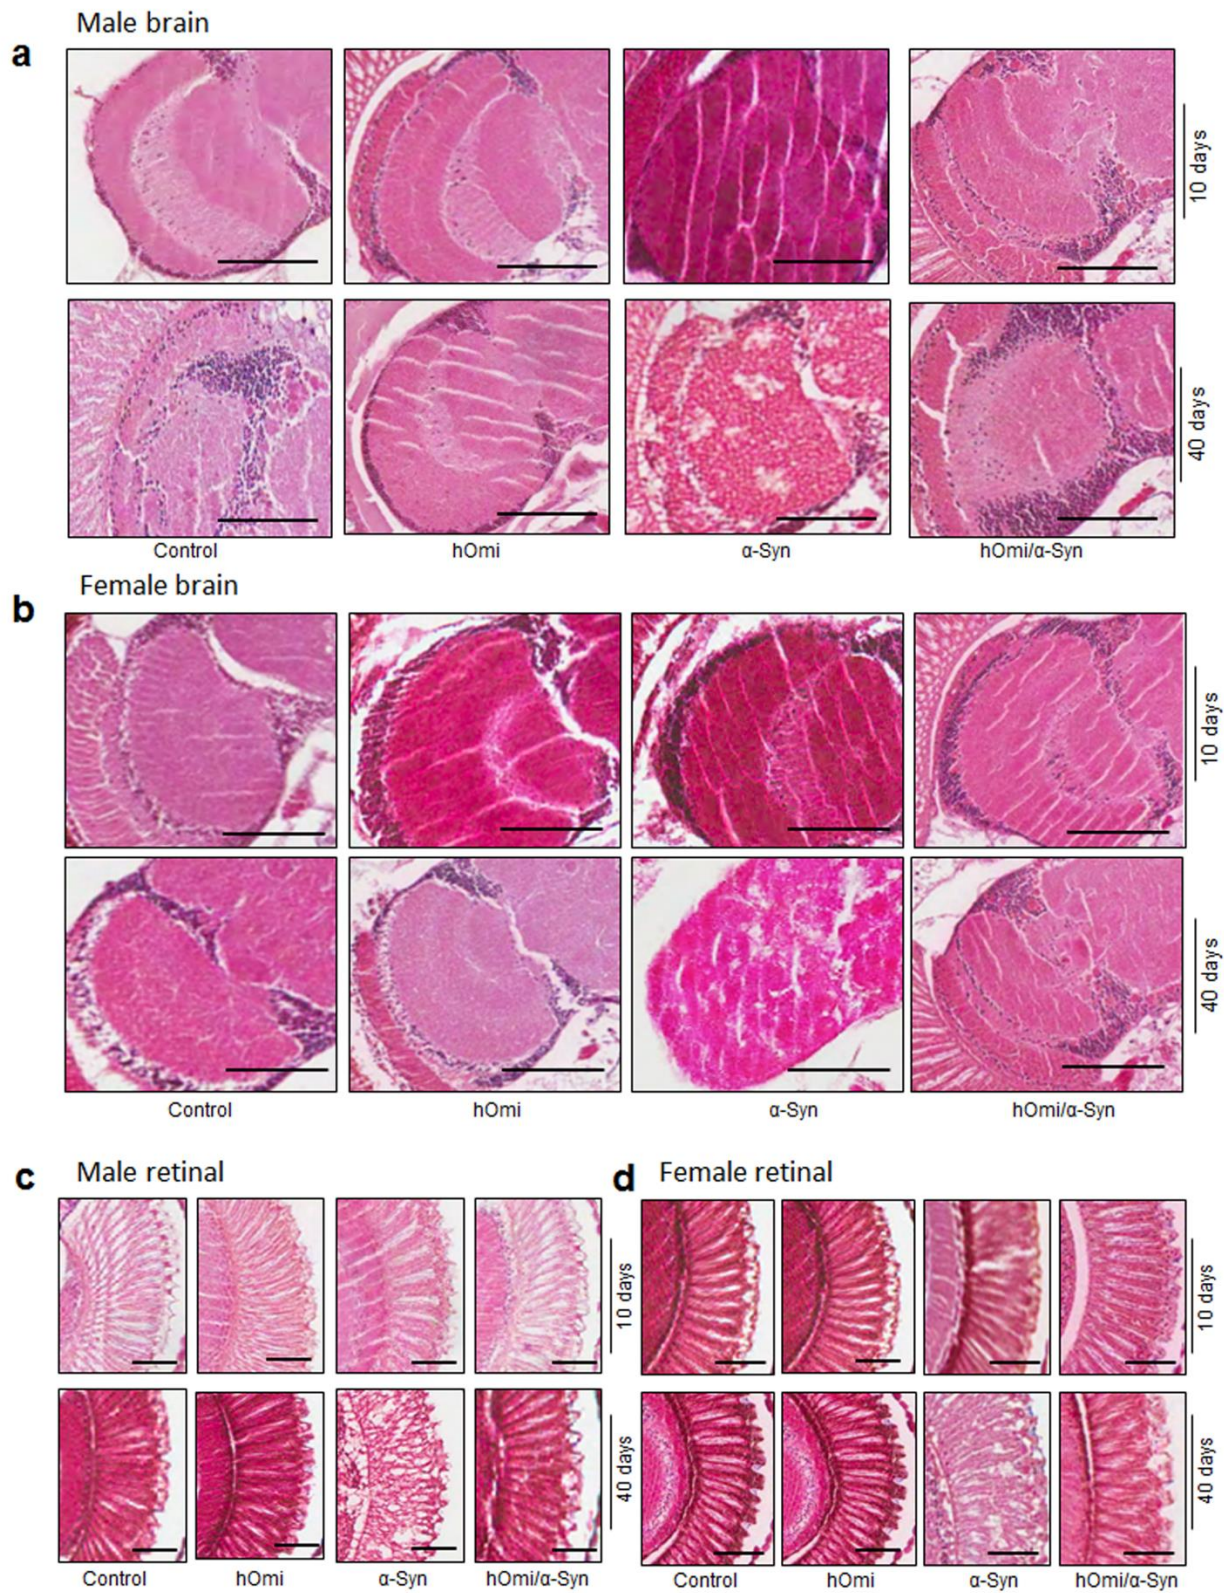

775 **Fig. 6** Histological examination confirming that hOmi prevented  $\alpha$ -Syn-Induced  
776 neurodegeneration in a Drosophila Model of Parkinson's Disease. **a** H&E staining of the cortex  
777 and neuropil region of male control flies and transgenic flies expressing hOmi,  $\alpha$ -Syn, or hOmi/ $\alpha$ -  
778 Syn, aged 10 or 40 days. Scale bar, 50  $\mu$ M. **b** H&E staining of the cortex and neuropil region of  
779 female control flies and transgenic flies expressing hOmi,  $\alpha$ -Syn, or hOmi/ $\alpha$ -Syn, aged 10 or 40  
780 days. Scale bar, 50  $\mu$ M. **c** H&E staining of retinal sections of male control flies and transgenic flies  
781 expressing hOmi,  $\alpha$ -Syn, or hOmi/ $\alpha$ -Syn, aged 10 days or 40 days. Scale bar, 50  $\mu$ M. **d** H&E  
782 staining of retinal sections of female control flies and transgenic flies expressing hOmi,  $\alpha$ -Syn, or  
783 hOmi/ $\alpha$ -Syn, aged 10 days or 40 days. Scale bar, 50  $\mu$ M.

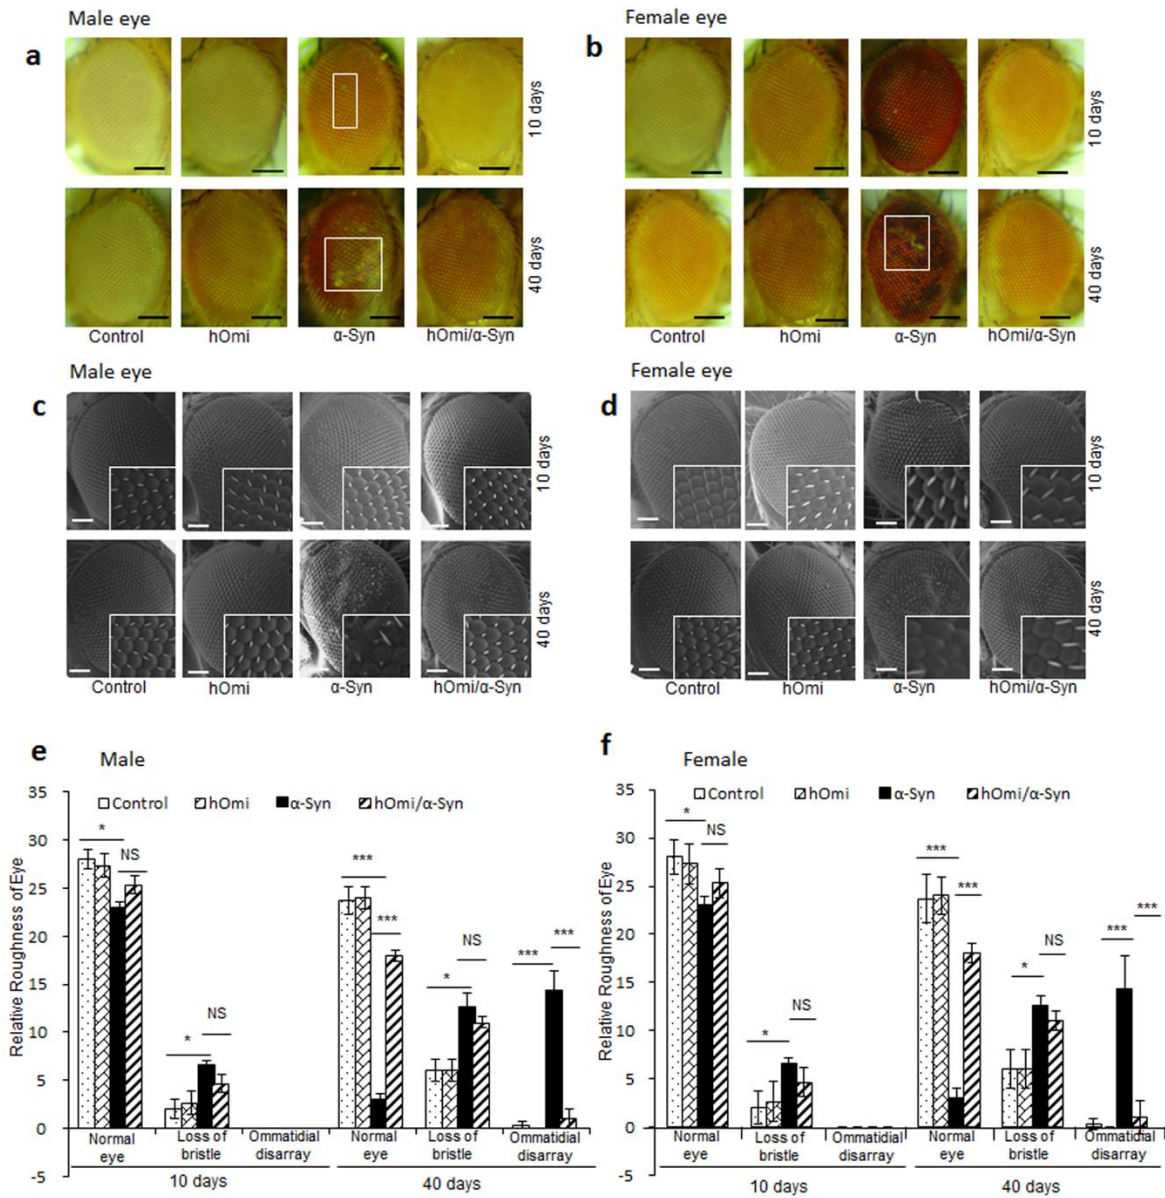

785 **Fig. 7** hOmi counteracted the  $\alpha$ -Syn-induced developmental defects in *Drosophila* Eye. **a, b** Light  
786 microscopic images of the eyes of control and transgenic flies expressing hOmi,  $\alpha$ -Syn, or hOmi/ $\alpha$ -  
787 Syn, aged 10 days or 40 days in male a and female flies b. Scale bar, 100  $\mu$ M. **c, d** Scanning  
788 electron microscopy images of eyes of control and transgenic flies expressing hOmi,  $\alpha$ -Syn, or  
789 hOmi/ $\alpha$ -Syn, aged 10 days or 40 days in male c and female flies d. Scale bar, 50  $\mu$ M. The 4  $\times$   
790 magnifications are presented in the square box. **e, f** Roughness counting of eye phenotypes based  
791 on normal phenotypes, loss of bristles and ommatidial disarray of control and transgenic flies  
792 expressing hOmi,  $\alpha$ -Syn, or hOmi/ $\alpha$ -Syn, aged 10 days or 40 days in male e and female flies f.  
793 Values are the mean  $\pm$  SEM from three independent experiments. NS, not significant, \* $p$ <0.05,  
794 \*\* $p$ <0.01, \*\*\* $p$ <0.001.

795 **Supplementary Information**

796 **Oligomeric  $\alpha$ -synuclein-specific degradation by HtrA2/Omi**  
797 **to bestow a neuroprotective function**

798 Hea-Jong Chung, Mohammad Abu Hena Mostofa Jamal, Md. Mashiar Rahman, Hyeon-Jin Kim  
799 and Seong-Tshool Hong

800 **Contents:**

801 Supplementary Table 1

802 Supplementary Figures 1, 2, 3, 4, 5, 6

803



804 **Supplementary Table**

805 **Table S1. Resources used in experiments**

| <b>Resources</b>                                                   | <b>Source</b>                            | <b>Identifier</b>   | <b>Purpose</b>                  |
|--------------------------------------------------------------------|------------------------------------------|---------------------|---------------------------------|
| <b>Antibodies</b>                                                  |                                          |                     |                                 |
| Mouse anti- $\alpha$ -Syn antibody                                 | Abcam, Cambridge, UK                     | cat# Ab1903         | Western blot, IHC               |
| Mouse anti- $\alpha$ -HtrA2/Omi antibody                           | BD Biosciences, New Jersey, USA          | cat# ABIN121159     | Western blot                    |
| Goat anti-mouse IgG (H+L) antibody                                 | Promega Corporation                      | cat# W4021          | Western blot                    |
| Rabbit anti- $\alpha$ -Syn                                         | Abcam, Cambridge, UK                     | cat# Ab51252        | IHC, Confocal Microscopic study |
| Rabbit anti- HtrA2/Omi                                             | Abcam, Cambridge, UK                     | cat# Ab641111       | IHC                             |
| Mouse anti human $\alpha$ -Syn antibody (ASy05), oligomer specific | Agricera antibodies, Sweden              | cat# AS132718       | IHC, Confocal Microscopic study |
| AlexaFluor 488-conjugated goat anti-mouse IgG (H+L)                | Molecular Probes, Eugene, Oregon, USA    | cat# A11029         | IHC, Confocal Microscopic study |
| Alexa Fluor 568-conjugated goat anti-rabbit IgG (H+L)              | Molecular Probes, Eugene, Oregon, USA    | cat# A11011         | IHC, Confocal Microscopic study |
| Mouse anti-PDI                                                     | Abcam, Cambridge, UK                     | cat# Ab5484         | Co-localization study           |
| Mito Tracker Red CMXRos                                            | Molecular Probes, Eugene, Oregon, USA    | cat# M7512          | Co-localization study           |
| Goat anti-rabbit IgG (H+L) conjugated to FITC                      | Abcam, Cambridge, UK                     | cat#Ab6717          | IHC, Confocal Microscopic study |
| Goat anti-mouse IgG (H+L) conjugated to Texas Red                  | Abcam, Cambridge, UK                     | cat# Ab6787         | IHC, Confocal Microscopic study |
| <b>Reagents</b>                                                    |                                          |                     |                                 |
| Horse serum                                                        | Sigma-Aldrich Inc                        | cat# H1270          | IHC                             |
| Goat serum                                                         | Sigma-Aldrich Inc                        | cat# G9023          | IHC                             |
| Protease inhibitor cocktail Complete mini                          | Roche Applied Science, Mannheim, Germany | cat# 11 836 153 001 | Brain homogenate preparation    |
| Recombinant Human $\alpha$ -Syn                                    | r Peptide                                | cat# S-1001-1       | <i>In vitro</i> oligomerization |
| UCF-101                                                            | Merck Millipore                          | cat# 496150         | <i>In vitro</i> enzymatic assay |
| VECTASTAIN Elite ABC Kit                                           | Vector Laboratories Inc.                 | cat# PK-6100        | IHC                             |
| Avidin/Biotin Blocking Kit                                         | Vector Laboratories Inc.                 | cat# SP-2001        | IHC                             |
| DAB Peroxidase (HRP) Substrate                                     | Vector Laboratories Inc.                 | cat# SK-4105        | IHC                             |
| Sephadex G-25 resign                                               | Sigma-Aldrich Inc.                       | cat# G25150         | Size exclusion chromatography   |
| Glass Wool                                                         | Sigma-Aldrich Inc.                       | cat# 20411          | Size exclusion chromatography   |

| <b>Experimental Model</b>                                                                  |                                            |                                          |                                             |
|--------------------------------------------------------------------------------------------|--------------------------------------------|------------------------------------------|---------------------------------------------|
| Mouse:<br>C57BL/6J-mnd2 mice                                                               | Jackson Laboratory                         | N/A                                      | <i>In vivo</i><br>experiments               |
| Fly:<br>$\alpha$ -Syn transgenic fly<br>( $\alpha$ -Syn <sup>+TM3</sup> )                  | Bloomington <i>Drosophila</i> stock center | FBst0008146                              | <i>In vivo</i><br>experiments               |
| Human Omi transgenic<br><i>Drosophila</i> (hOmi <sup>+Cy0</sup> )                          | In this study                              | N/A                                      | <i>In vivo</i><br>experiments               |
| $\alpha$ -Syn and hOmi co-<br>overexpressed <i>Drosophila</i><br>(hOmi/+; $\alpha$ -Syn/+) | In this study                              | N/A                                      | <i>In vivo</i><br>experiments               |
| Driver line elav-GAL4                                                                      | Bloomington <i>Drosophila</i> stock center | FBst0000458                              | pan neuronal<br>expression of<br>transgenes |
| Driver line GMR-GAL4                                                                       | Bloomington <i>Drosophila</i> stock center | FBti0002994                              | Expression of<br>transgenes in eye          |
| <b>Primers</b>                                                                             |                                            |                                          |                                             |
| Gene name to identify                                                                      | Forward Primer                             | Reverse primer                           |                                             |
| $\alpha$ -Syn                                                                              | 5'-TGT AGG CTC CAA AAC CAA GG-3'           | 5'-GCT CCC TCC ACT GTC TTC<br>TG-3'      |                                             |
| hOmi                                                                                       | 5'- GTC GCC GGA TCC ATG CGC TAC<br>ATT-3'  | 5'-GAG CTC TCG AGT CAT TCT<br>GTG ACC-3' |                                             |

806

807 **Supplementary Figures**

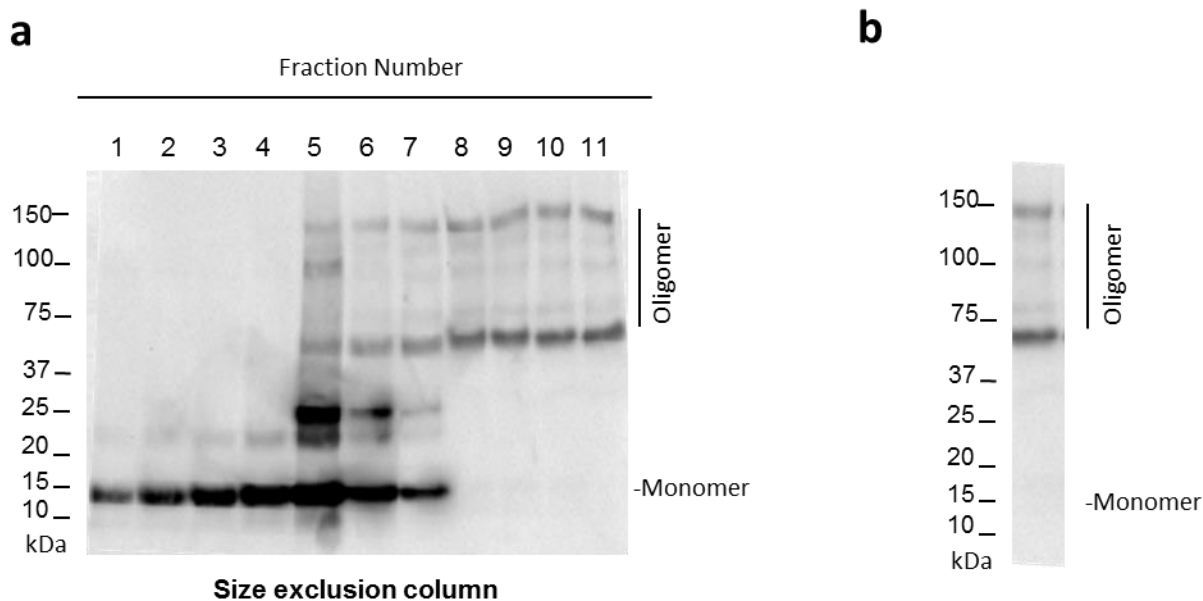

808

809 **Figure S1. Oligomeric  $\alpha$ -Syn was isolated using a size exclusion column.**

810 **a** SDS-PAGE gel showing oligomerized  $\alpha$ -Syn fractionations after applying a size exclusion  
811 column. human recombinant monomeric  $\alpha$ -Syn was oligomerized, and monomer, dimer, trimer,  
812 tetramer as well as higher order oligomers could be distinguished by molecular weight. **b** Isolated  
813 oligomeric  $\alpha$ -Syn using the size exclusion column.

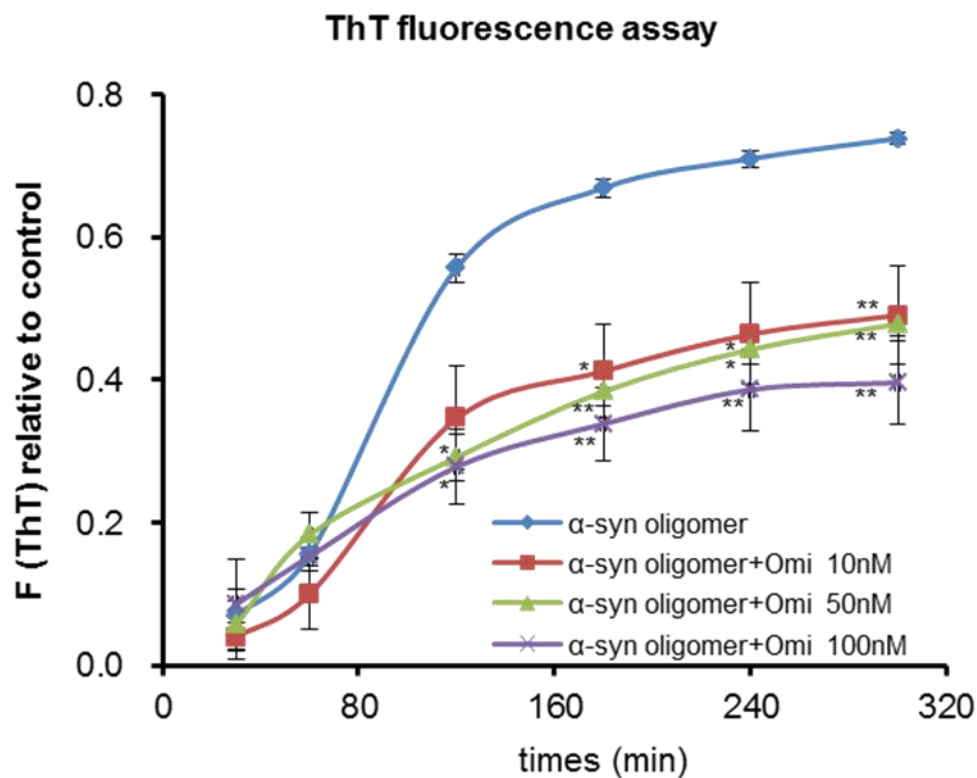

814

815 **Figure S2. hOmi specifically degraded oligomeric  $\alpha$ -Syn in a dose-dependent manner.**

816 The degradation of  $\alpha$ -Syn was measured by the fluorescence intensity after staining of  $\alpha$ -Syn with

817 the oligomer-specific fluorescent dye ThT. Values represent the mean  $\pm$  SEM from three

818 independent experiments. \* $p$ <0.05 and \*\* $p$ <0.01.

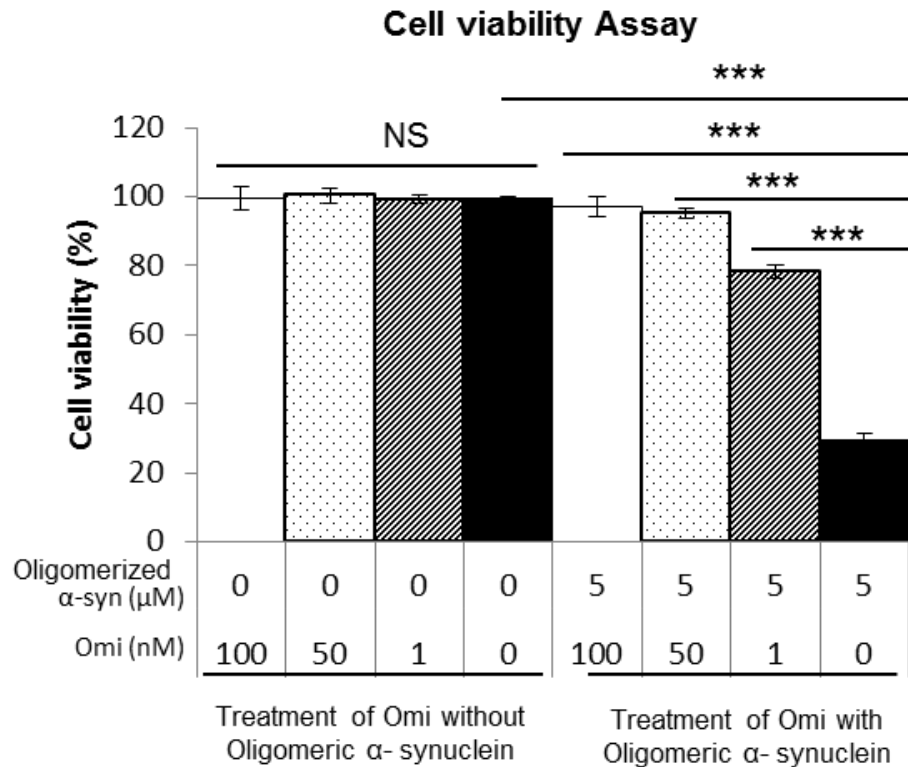

819

820

821 **Figure S3. The neurotoxicity of oligomeric  $\alpha$ -Syn was abolished after co-treatment with**

822 **hOmi in a dose-dependent manner.**

823 Recombinant hOmi treatment was applied at 0 nM, 10 nM, 50 nM and 100 nM, and cell viability

824 was assessed using the CCK-8 assay. Values represent the mean  $\pm$  SEM from three independent

825 experiments. NS, not significant and \*\*\* $p$ <0.001.

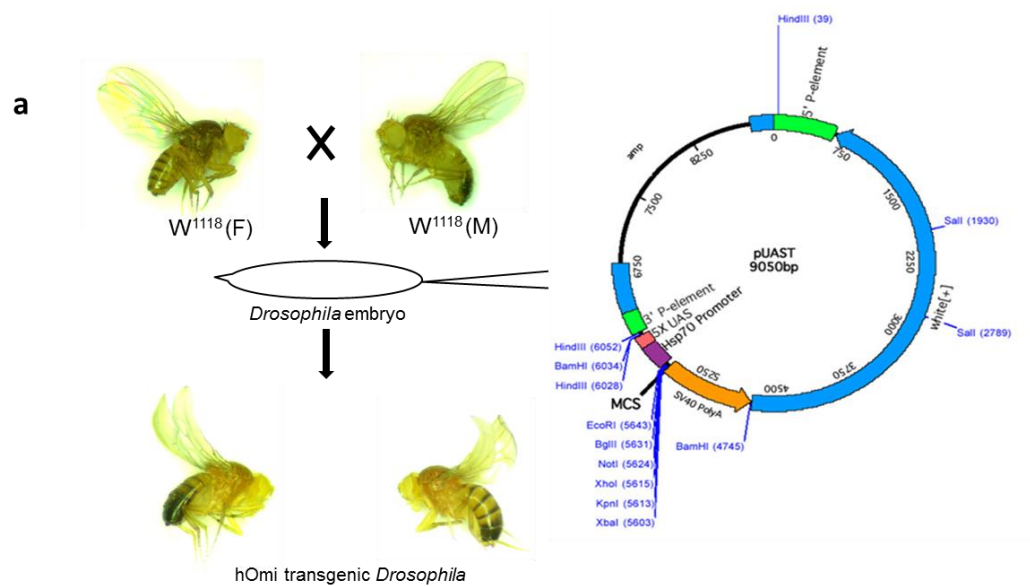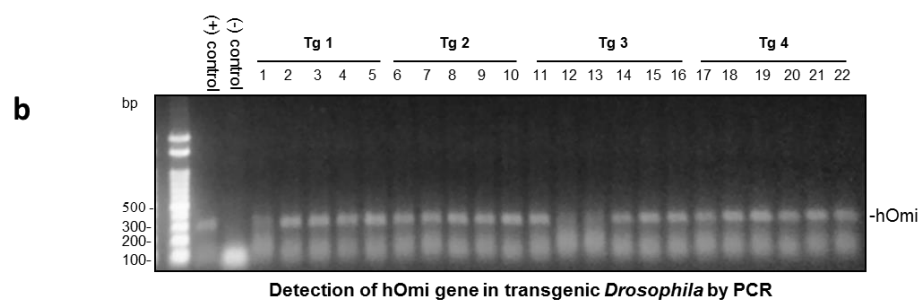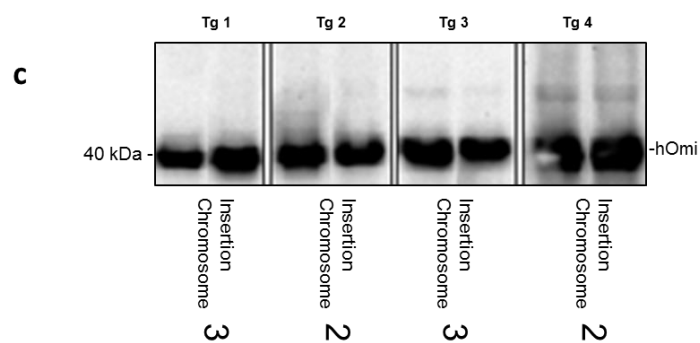

Detection of hOmi protein in transgenic *Drosophila* by Western blot

827 **Figure S4. A transgenic *Drosophila* line expressing human HtrA2/Omi (hOmi) was**  
828 **successfully developed.**

829 **a** Schematic representation of the development of human HtrA2/Omi (hOmi) transgenic  
830 *Drosophila* lines. The full-length hOmi gene was cloned into the GAL4-responsive pUAST  
831 expression vector. Transgenic *Drosophila* lines of hOmi were generated by microinjection of a  
832 plasmid bearing the P element transposase under the control of the heat shock 70 (hs- $\pi$ ) promoter  
833 as a source of transposase into w<sup>1118</sup> embryos. **b** Detection of the hOmi gene in 4 transgenic  
834 *Drosophila* lines by PCR. **c** Detection of the hOmi protein in 4 transgenic *Drosophila* head  
835 homogenates by western blotting, in which head homogenates were obtained from the progeny of  
836 hOmi crossed with elav-GAL4 flies.

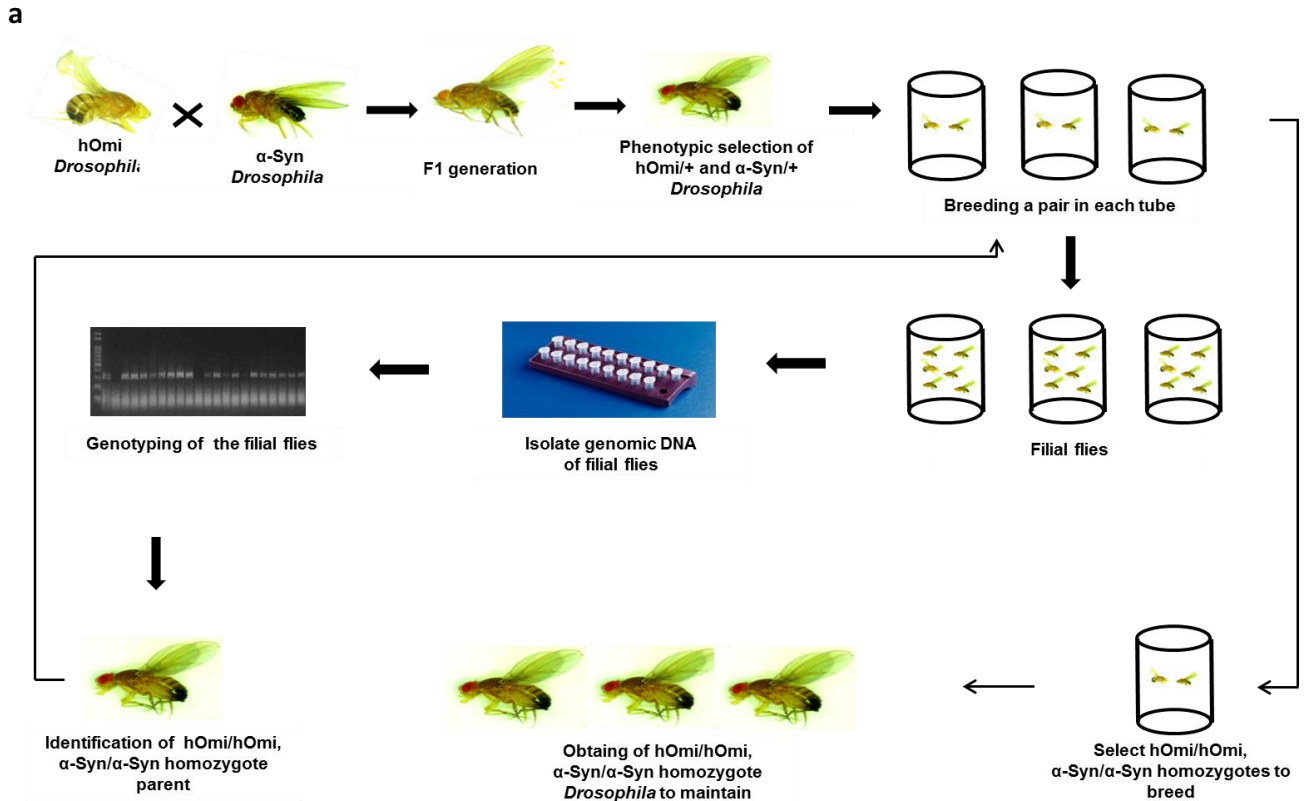

837

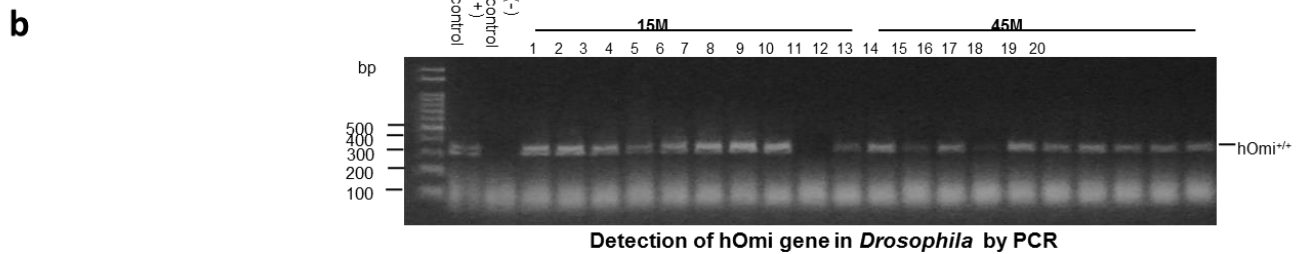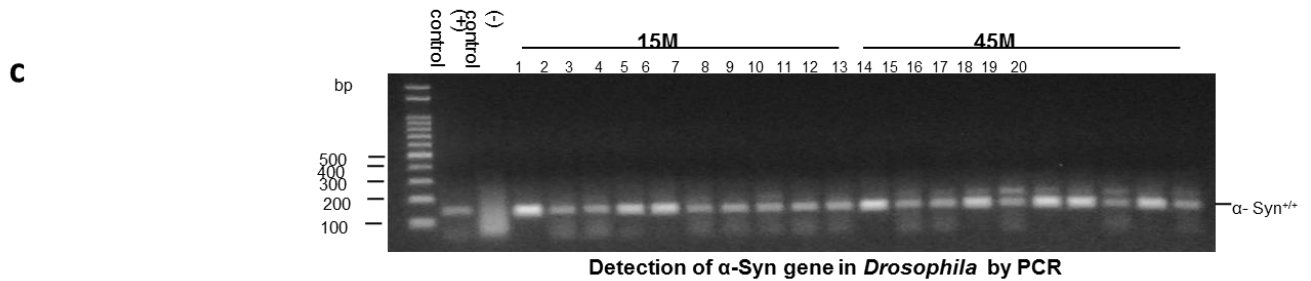

838



839 **Figure S5. A Transgenic *Drosophila* line carrying both hOmi and  $\alpha$ -Syn genes as homozygotes**  
840 **was developed by massive PCR screening.**

841 **a** Schematic representation of developing *Drosophila* lines carrying both hOmi and  $\alpha$ -Syn genes  
842 as homozygotes by crossing hOmi transgenic *Drosophila* Tg4 (X/Y; hOmi/Cyo; +/+) with  $\alpha$ -Syn  
843 transgenic *Drosophila* (X/Y; +/+;  $\alpha$ -Syn/ $\alpha$ -Syn). **b** Example of 2 transgenic *Drosophila* lines  
844 carrying hOmi as homozygotes. The *Drosophila* lines carrying hOmi as homozygotes were  
845 assessed by genotyping fly progenies. If all the progenies from either parent crossed with control  
846 carried hOmi, the parental flies were identified as homozygotes and used in this work. **c** Example  
847 of 2 transgenic *Drosophila* lines having  $\alpha$ -Syn as homozygotes. The *Drosophila* lines having  $\alpha$ -  
848 Syn as homozygotes were assessed by genotyping the fly progenies. If all the progenies from either  
849 parent crossed with the control had hOmi, the parental flies were identified as homozygotes and  
850 used in this work.

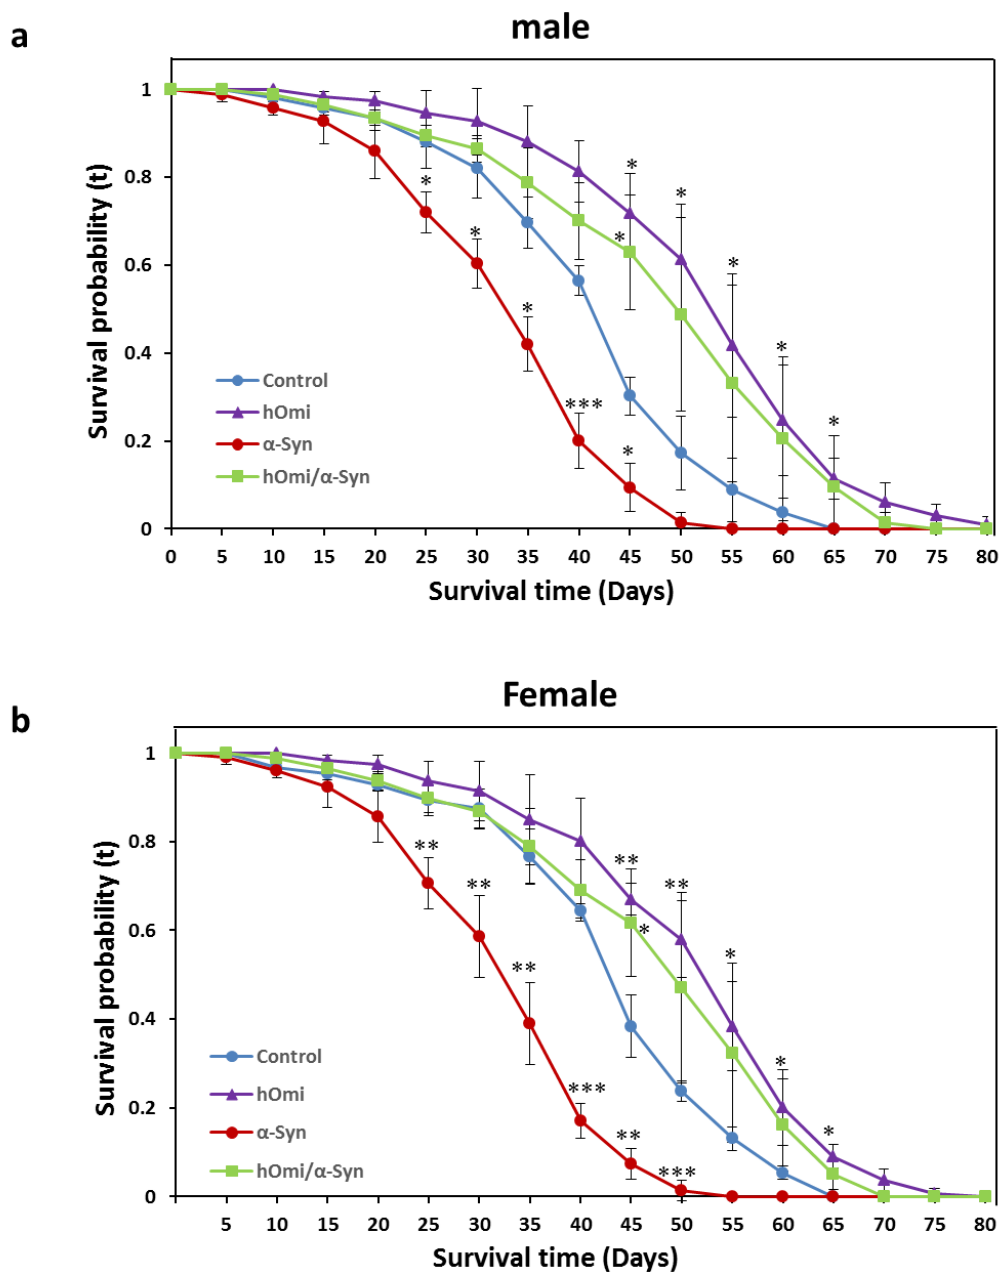

851

852 **Figure S6. The Kaplan–Meier Survival assay measured by the survival rate of hOmi,  $\alpha$ -Syn,**  
853 **or hOmi/ $\alpha$ -Syn flies demonstrated a neuroprotective role of hOmi against  $\alpha$ -Syn-induced**  
854 **cytotoxicity in both male a and female b flies. Values are the mean  $\pm$  SEM from three**  
855 **independent experiments. NS, not significant, \* $p$ <0.05, \*\* $p$ <0.01, \*\*\* $p$ <0.001.**
